# Supplementary material
Source: bioRxiv or medRxiv preprint supplement (https://www.biorxiv.org/highwire/filestream/62391/field_highwire_adjunct_files/0/204685-1.pdf)
Supplement: Supplementary file [file 204685-1.pdf]

Supplementary Information for: Detecting genome-wide  
directional effects of transcription factor binding on polygenic  
disease risk

October 17, 2017

**Contents**

|                                                              |           |
|--------------------------------------------------------------|-----------|
| <b>Supplementary Note</b>                                    | <b>2</b>  |
| Model and estimands . . . . .                                | 2         |
| Derivations and description of method . . . . .              | 3         |
| Computational considerations . . . . .                       | 4         |
| Additional interpretation of results . . . . .               | 5         |
| <b>Supplementary Tables</b>                                  | <b>7</b>  |
| <b>Supplementary Figures</b>                                 | <b>17</b> |
| <b>Appendix: the distribution of GWAS summary statistics</b> | <b>21</b> |

# Supplementary Note

## Model and estimands

### The model

Let  $M$  be the length of the genome. Given a genotype vector  $x \in \mathbb{R}^M$  of an individual sampled randomly from some population distribution and a vector  $\beta \in \mathbb{R}^M$  of causal SNP effects, we model the phenotype  $y$  with a standard linear model:

$$y|\beta, x \sim \mathcal{N}(x^T \beta, \sigma_e^2). \quad (1)$$

We assume that the genotypes are standardized in the population, i.e., that  $E(x_m) = 0$  and  $E(x_m^2) = 1$  for all SNPs  $m$ . We assume the same of the phenotype:  $E(y) = 0$  and  $E(y^2) = 1$ . Because our GWAS sample will be very large, these assumptions are for expositional convenience only.

The last ingredient of our model is the connection between  $\beta$  and the signed functional annotation of interest  $v \in \mathbb{R}^M$ . To get this, we assume that  $\beta$  is sampled from a distribution satisfying

$$E(\beta|v) = \mu v, \quad \text{cov}(\beta|v) = \sigma^2 I \quad (2)$$

where  $\mu$  and  $\sigma$  are scalars.

### The estimands

The first estimand we might be interested in is  $\mu$ , which would tell us the expected change in the per-normalized-genotype effect  $\beta_m$  of SNP  $m$  for every unit increase of  $v_m$ . However, this estimand depends on the units of  $v$ : if we multiply  $v$  by a constant  $c$ , then  $\mu$  is decreased by a factor of  $c$ . We therefore introduce a second estimand, the *functional correlation*  $r_f$ , which is defined as the genetic correlation between  $y$  and the 100%-heritable phenotype  $x^T v$ , i.e.,

$$r_f := \text{corr}(x^T \beta, x^T v). \quad (3)$$

Under our model,

$$\text{cov}(x^T \beta, x^T v) = E(\beta^T x x^T v) \quad (4)$$

$$= E(\beta)^T E(x x^T) v \quad (5)$$

$$= \mu v^T R v \quad (6)$$

where  $R = E(x x^T) \in \mathbb{R}^{M \times M}$  is the (signed) population LD matrix of the genotypes, and  $v$  is fixed and known. Since

$$\text{var}(x^T v) = E(v^T x x^T v) = v^T R v, \quad (7)$$

we obtain

$$r_f = \frac{\text{cov}(x^T \beta, x^T v)}{\sqrt{\text{var}(x^T \beta) \text{var}(x^T v)}} = \mu \sqrt{\frac{v^T R v}{h_g^2}}. \quad (8)$$

where  $h_g^2 = \text{var}(x^T \beta)$  is the SNP-heritability of the phenotype. Note that  $r_f$  can also be derived under a model in which  $v$  is also modeled as random and jointly distributed with  $\beta$ , in which case  $r_f$  is equal to a standard random-effects genetic correlation.<sup>1</sup> The choice to model  $v$  as fixed here arises from the fact that, since it is a complicated biological object, we wish to make as few assumptions as possible about its structure.

In addition to  $\mu$  and  $r_f$ , we might wish to know how much total phenotypic variance is explained by the signed contribution of  $v$  to  $\beta$ . This parameter,  $h_v^2$ , is defined by

$$h_v^2 := \text{var}(\mu x^T v) = \mu^2 v^T R v. \quad (9)$$

This is equal to the prediction  $r^2$  that we would obtain if we tried to predict  $y$  from  $x^T v$ . If we scale  $h_v^2$  by the total heritability of  $y$ , we obtain the proportion of heritability explained by the signed contribution of  $v$ , i.e.,

$$\frac{h_v^2}{h_g^2} = \frac{\mu^2 v^T R v}{h_g^2} = r_f^2. \quad (10)$$

We remark that for annotations with small support,  $r_f$  and its associated quantities should generally be expected to be small in magnitude. To see this, define  $h_{|v|}^2$  to be the prediction  $r^2$  that we would obtain if we predicted  $y$  from an optimal predictor that was constrained to be zero outside the support of  $v$ . By construction we have  $h_v^2 \leq h_{|v|}^2$ , but since  $h_{|v|}^2$  is the total phenotypic variance explained by SNPs in the support of  $v$ , this implies that  $r_f^2 \leq h_v^2/h_g^2 \leq h_{|v|}^2/h_g^2$  is at most the proportion of heritability explained by the SNPs in the support of  $v$ .

## Derivations and description of method

### Main derivation

Now suppose that  $N$  individuals  $x_1, \dots, x_N$  have been sampled i.i.d. from the population with corresponding phenotypes  $y_1, \dots, y_N$ , and that we are given the vector of marginal correlations between each SNP and the trait, i.e., we are given

$$\hat{\alpha} := \frac{1}{N} \sum_{n=1}^N x_n y_n \in \mathbb{R}^M. \quad (11)$$

It is easily shown that  $E(\hat{\alpha}|\beta) = R\beta$  (see Proposition 2 in Appendix), from which it follows that

$$E(\hat{\alpha}|v) = E(E(\hat{\alpha}|\beta, v)|v) \quad (12)$$

$$= E(R\beta|v) \quad (13)$$

$$= \mu Rv. \quad (14)$$

This means that naive regression of  $\hat{\alpha}$  on the *signed LD profile*  $Rv$  of  $v$  is an unbiased estimator of  $\mu$ . However, ordinary least-squares is optimal only when the observations have i.i.d. noise. In this regression, each SNP provides one observation  $(\hat{\alpha}_m, (Rv)_m)$ , but under our model the covariance of  $\hat{\alpha}_m$  and  $\hat{\alpha}_{m'}$  given  $Rv$  is non-zero. Therefore, if we can model this covariance structure properly, we should be able to use generalized least-squares to reduce variance and increase power. In Theorem 1 of Appendix, we show that indeed

$$\text{cov}(\hat{\alpha}|v) \approx \sigma^2 R^2 + \frac{R}{N} =: \Omega. \quad (15)$$

The default version of signed LD profile regression estimates  $\Omega$  from the reference panel and the chi-squared statistics of the GWAS in question and then performs generalized least-squares using a pseudo-inverse of  $\Omega$  to de-couple correlated errors among SNPs. It can be shown that if a) all causal SNPs are typed, b) sample size is infinite, and c)  $R$  is invertible, this method is equivalent to estimating  $\beta$  via  $R^{-1}\hat{\alpha}$  and then regressing this estimate on  $v$  to obtain  $\mu$ , which is the optimal approach in that setting. Note that because we generate P-values for hypothesis testing empirically (see below), we are guaranteed that our generalized least-squares scheme will remain well-calibrated even if our estimate of the matrix  $\Omega$  is inaccurate due to, e.g., mis-match between the reference panel and the study population.

The point estimate arising from the regression described above is an estimate  $\hat{\mu}$  of  $\mu$ . To obtain an estimate of  $r_f$ , we plug into Equation 3, estimating  $h_g^2$  using the ‘‘aggregate estimator’’ of heritability<sup>2</sup> given by

$$\hat{h}_g^2 := \frac{|\hat{\alpha}|_2^2 - \frac{M}{N}}{\frac{1}{M_{5,50}} \sum_m \widehat{\ell}_m} \quad (16)$$

where  $|\hat{\alpha}|_2$  is the  $\ell_2$ -norm of  $\hat{\alpha}$ ,  $\widehat{\ell}_m$  is a reference-panel-based estimate of the LD-score  $\ell_m := \sum_{m'} R_{mm'}^2$  of SNP  $m$ , and  $M_{5,50}$  is the number of causal SNPs with MAF between 5% and 50%. Equation 3 also has a  $v^T Rv$  term; for convenience we approximate this term by  $v^T v$ ; our simulations show that we do not suffer from this approximation, and it is empirically quite accurate for our annotations (data not shown).

To estimate  $h_v^2/h_g^2$ , we use the jackknife to estimate the sampling variance  $\widehat{\tau}^2$  of the statistic  $\widehat{r}_f$ , and then report  $\widehat{r}_f^2 - \widehat{\tau}^2$ . Though this is an exactly unbiased estimate of  $h_v^2$  only if  $\widehat{r}_f$  is normally distributed and the jackknife provides an accurate estimate of the sampling variance of  $\mu$ , our simulations show that it is very close to unbiased in practice. Note that while we use a jackknife estimate of the variance of  $\widehat{r}_f$  to

estimate  $r_f^2$ , this is not how we compute P-values for null hypothesis testing; for details of null hypothesis testing, see below.

To estimate  $h_v^2$ , we simply multiply our estimate of  $r_f^2 = h_v^2/h_g^2$  by our estimate of  $h_g^2$ .

## Untyped SNPs

Typically, our set of potentially causal SNPs is much larger than the set of SNPs for which we have GWAS summary statistics. Signed LD profile works well in such scenarios: it simply uses only the entries of  $Rv$  corresponding to typed SNPs in the regression. Because drastically different sets of typed SNPs require estimation of  $\Omega$  anew, we estimate  $\Omega$  assuming that all non-MHC HapMap3 SNPs are typed, and then restrict the summary statistics for each trait analyzed to non-MHC HapMap3 SNPs only.

## Null hypothesis testing

To test the null hypothesis  $H_0 : \mu = 0$  (or, equivalently,  $H_0 : r_f = 0$ ), we split the genome into approximately 300 blocks of approximately the same size with the block boundaries constrained to fall on estimated recombination hotspots.<sup>3</sup> We then define the null distribution of our statistic as the distribution arising from independently multiplying  $v$  by an independent random sign for each block. We perform this empirical sign-flipping many times to obtain an approximation of the null distribution and corresponding P-values. Our use of sign-flipping ensures that any true positives found by our method are the result of genuine first-moment effects; if in contrast we estimated standard errors using least-squares theory or a re-sampling method such as the jackknife or bootstrap, our method might inappropriately reject the null hypothesis only because the variance of  $\beta$  is higher in parts of the genome where  $Rv$  is large in magnitude. This would make our method susceptible to confounding due to unsigned enrichments, as might arise from the co-localization of TF binding sites with enriched regulatory elements such as enhancer regions. Additionally, the fact that we flip the signs of SNPs in each block together ensures that our null distribution preserves any potential relationship of our annotation to the LD structure of the genome. In choosing how many blocks to use for this procedure, we took into account that i) the fewer blocks we use the fewer assumptions we make about LD structure and the faster we can compute P-values, and ii) the more blocks we use the higher the precision of the P-values that we can obtain. Our choice to use 300 blocks is a compromise between these two considerations.

## Controlling for covariates and the signed background model

Given a signed covariate  $u \in \mathbb{R}^M$ , we can perform inference on the signed effect of  $v$  conditional on  $u$ . This is done by first regressing  $Ru$  out of  $\hat{\alpha}$  and out of  $Rv$  using the generalized least-squares method outlined above, and then proceeding as usual with the residuals of  $\hat{\alpha}$  and  $Rv$ . This can be done simultaneously for multiple covariates  $u$ .

Unless stated otherwise, all analyses in this paper are done controlling for a “signed background model” consisting of 5 annotations  $u^1, \dots, u^5$ , defined by

$$u_m^i = \mathbf{1} \{ \text{MAF}_m \text{ is in } i\text{-th quintile} \} \sqrt{2\text{MAF}_m(1 - \text{MAF}_m)^{1+\alpha_s}} \quad (17)$$

where  $\text{MAF}_m$  is the minor allele frequency of SNP  $m$  and  $\alpha_s$  is a parameter describing the MAF-dependence of the signed effect of minor alleles on phenotype. Based on the literature on MAF-dependence of the unsigned effects  $\text{var}(\beta_m)$ , we set  $\alpha_s = -0.3$ .<sup>4</sup>

## Computational considerations

We model the LD matrix  $R$  as being block-diagonal, with the block endpoints defined by recombination hotspots.<sup>3</sup> This allows both more statistically efficient estimation of the true  $Rv$  as well as more efficient computation.

For estimating  $\Omega$ , we use the above block-diagonal decomposition, together with a truncated singular value decomposition applied in each block. Specifically, we store enough singular vectors to capture 95% of the spectrum of each LD block. This is a pre-processing step that need only be carried out once per reference panel, and the relevant outputs of this step for the 1000G Phase 3 Europeans can be downloaded from our website.

## Additional interpretation of results

We list complementary evidence for the associations in Table 1 that are not discussed in the main text.

**POL2/TBP and Crohn's (+)** We found several associations between binding of RNA polymerase II (POL2) and Crohn's disease, matched by an association with the same direction of effect for TATA binding protein (TBP), which forms part of the transcription pre-initiation complex. These associations are consistent with the theory that, due to the time-scale required for many immune responses, those responses tend to involve up-regulation rather than down-regulation of gene expression since the former can be done more quickly than the latter. This can either happen via rapid, de novo recruitment of RNA polymerase,<sup>5</sup> or via release of a "poised" state wherein POL2 is present at the gene promoter but remains paused until an additional signal quickly triggers transcription.<sup>6,7</sup> This theory predicts that we would see positive associations for many POL2 annotations provided they contain enough genes to have a substantial number of immune genes, and that the association should be stronger for annotations that are biased toward POL2 binding specifically near immune genes. Indeed, the most significant association we detected was for a POL2 annotation in the lymphoblastoid cell line GM18951, and using the ChIP-seq enrichment tool GREAT,<sup>8</sup> we found that the ChIP-seq peaks used to create this annotation showed enrichment in several gene ontology biological processes corresponding to immune response programs such as "antigen binding" (3.2x enrichment, binomial  $p = 1.57 \times 10^{-33}$ ), "cellular response to type I interferon" (4.4x enrichment, binomial  $p = 1.76 \times 10^{-84}$ ), and "interferon-gamma-mediated signalling pathway" (2.8x enrichment,  $p = 5.0 \times 10^{-46}$ ). Thus, these results may provide evidence that, due to the bias of the immune system toward up-regulation, variants that increase the amount of bound polymerase at immune response genes impart an increased risk of Crohn's disease.

**SP1 and anorexia (-)** There is evidence that increased SP1 activity is protective for several psychiatric conditions.<sup>9,10</sup> Separately, SP1 has been shown to be regulated by insulin levels<sup>11,12</sup> and in turn to modulate expression in the hypothalamus of POMC, an important regulator of appetite.<sup>13,14</sup> It has also been shown to have a key role in the induction of leptin following insulin-stimulated glucose metabolism in adipocytes.<sup>15</sup> However, since SP1 has many binding partners, it could also be that this association is driven by the binding of one those partners.

**FOS and HDL (+)** In mice, liver-specific overexpression of the *FOS* gene leads to increased intrahepatic cholesterol and modulation of genes in metabolic pathways connected to cholesterol and fatty acid biosynthesis.<sup>16</sup> FOS has also been shown to be up-regulated when HeLa cells are grown in a sterol-depleted medium designed to activate cellular sterol homeostatic machinery,<sup>17</sup> and the AP-1 complex that it forms has been shown to be down-regulated by high-cholesterol diet in model organisms.<sup>18</sup> A different mechanism is suggested by the fact that in humans, a mutation in the *FOS* gene is associated with congenital generalized lipodystrophy, a phenotype characterized by absence of adipocytes.<sup>19</sup>

**CTCF and eczema (+)** Cell-type-specific deletion of CTCF in Langerhans cells (skin-resident dendritic cells) leads to a reduced pool of systemic dendritic cells and a much reduced pool of Langerhans cells.<sup>20</sup> More generally, CTCF has been shown to alter immune processes,<sup>21-24</sup> and a genetic variant associated with risk of atopy has been shown to alter CTCF binding.<sup>25</sup> Another possible mechanism for our result is suggested by the fact that the cohesin complex, which frequently binds to DNA in the same locations as CTCF, is necessary for maintenance of epidermal progenitor cells.<sup>26</sup> A third possibility is that, given the negative relationship between CTCF binding and methylation, together with the genome-wide depletion of methylation observed in atopy,<sup>27</sup> this association could be explained by SNPs that alter CpG islands in ways that affect methylation and therefore CTCF binding.

**ELF1 and Crohn's (+)** ELF1 is a hematopoietic and immune regulator<sup>28</sup> that lies in a genome-wide significant Crohn's disease locus in a GWAS of a Japanese population.<sup>29</sup> Alterations of ELF1 expression are associated with autoimmunity.<sup>28</sup> Additionally, its binding sites are enriched for autoimmune risk SNPs<sup>30</sup> and are overrepresented among promoters of genes that are differentially expressed in inflammatory bowel disease intestinal tissue relative to control tissue.<sup>31</sup>

**E2F1 and Crohn's (+)** E2F1 has roles in immunity, and E2f1-deficient mice challenged with lipopolysaccharide exhibit an attenuated inflammatory response.<sup>32</sup> Additionally, chronic colonic inflammation is associated with release of E2F1 inhibition and activation of E2F1 target genes.<sup>33</sup> Finally, activity of RB, an upstream regulator of the E2F1 pathway, is a highly sensitive and specific test for distinguishing Crohn's disease from ulcerative colitis in some cases, with RB activity being elevated in Crohn's disease.<sup>34</sup>

**ETS1 and Crohn's (+)** ETS1 is known to regulate genes involved in immunity<sup>28</sup> and the *ETS1* gene lies in GWAS loci for multiple autoimmune traits.<sup>35,36</sup> Absence of ETS1 leads to T lymphocytes that respond more weakly to stimuli and are fewer in number,<sup>37,38</sup> as well as to abnormal B lymphocyte differentiation.<sup>39</sup> Additionally, adoptive transfer of Th cells with no functional copies of the *Ets-1* gene fails to induce colitis in severe combined immunodeficient (SCID) mice, whereas Th cells with functional copies of the gene do induce colitis.<sup>40</sup> Finally, viable *Ets-1*-deficient mice are protected from inflammatory bowel disease relative to wild-type mice.<sup>41</sup>

## Supplementary Tables

**Table S1: Summary information about ChIP-seq annotations used in analyses.**  $v$  denotes annotation,  $M$  denotes the total number of SNPs in the reference panel,  $|v|_0$  denotes the number of SNPs with non-zero values of  $v$ , and  $|v|_2$  denotes the 2-norm of  $v$ .

| Lab   | Cell line | Experiment | BASSET AUPRC | $ v _0$ | $ v _0/M$ (%) | $ v _2$ |
|-------|-----------|------------|--------------|---------|---------------|---------|
| HAIB  | SKNSHRA   | CTCF       | 0.880098     | 18646   | 0.19          | 13.20   |
| BROAD | NHA       | CTCF       | 0.869841     | 27912   | 0.28          | 12.68   |
| HAIB  | A549      | CTCFSC5916 | 0.866840     | 21517   | 0.22          | 12.73   |
| UW    | NB4       | CTCF       | 0.866150     | 25419   | 0.25          | 13.23   |
| UW    | HRE       | CTCF       | 0.864149     | 28846   | 0.29          | 13.64   |
| HAIB  | A549      | CTCFSC5916 | 0.863801     | 21011   | 0.21          | 13.41   |
| UTA   | HUVEC     | CTCF       | 0.861944     | 21000   | 0.21          | 14.18   |
| BROAD | HUVEC     | CTCF       | 0.859699     | 29576   | 0.30          | 12.68   |
| UW    | HFF       | CTCF       | 0.859124     | 25034   | 0.25          | 11.61   |
| UW    | RPTEC     | CTCF       | 0.858547     | 44995   | 0.45          | 17.53   |
| BROAD | HMEC      | CTCF       | 0.858372     | 27488   | 0.27          | 12.58   |
| UW    | HASP      | CTCF       | 0.858100     | 29663   | 0.30          | 14.75   |
| UW    | GM12878   | CTCF       | 0.858056     | 25981   | 0.26          | 13.11   |
| UW    | A549      | CTCF       | 0.857446     | 35097   | 0.35          | 15.54   |
| UW    | HFFMYC    | CTCF       | 0.857241     | 38004   | 0.38          | 14.93   |
| UTA   | GM12878   | CTCF       | 0.856204     | 24907   | 0.25          | 15.67   |
| UW    | GM06990   | CTCF       | 0.855834     | 33120   | 0.33          | 14.51   |
| UW    | HMF       | CTCF       | 0.854815     | 35825   | 0.36          | 16.13   |
| UW    | HCFAA     | CTCF       | 0.854650     | 26214   | 0.26          | 13.36   |
| UW    | GM12874   | CTCF       | 0.854489     | 24822   | 0.25          | 12.73   |
| UW    | HEK293    | CTCF       | 0.854351     | 31140   | 0.31          | 15.48   |
| UTA   | HEPG2     | CTCF       | 0.853428     | 17547   | 0.18          | 13.62   |
| UW    | MCF7      | CTCF       | 0.852776     | 40427   | 0.40          | 17.06   |
| UW    | NHEK      | CTCF       | 0.852312     | 31784   | 0.32          | 13.27   |
| HAIB  | H1HESC    | CTCFSC5916 | 0.852040     | 30644   | 0.31          | 18.33   |
| UW    | HVMF      | CTCF       | 0.851735     | 33859   | 0.34          | 14.79   |
| UW    | GM12875   | CTCF       | 0.851254     | 26436   | 0.26          | 13.21   |
| UW    | HCT116    | CTCF       | 0.851195     | 36485   | 0.36          | 15.57   |
| UW    | GM12865   | CTCF       | 0.850843     | 29599   | 0.30          | 14.14   |
| HAIB  | HEPG2     | CTCFSC5916 | 0.850684     | 29285   | 0.29          | 17.25   |
| UW    | HRPE      | CTCF       | 0.850296     | 33503   | 0.34          | 16.27   |
| BROAD | H1HESC    | CTCF       | 0.849116     | 47350   | 0.47          | 20.96   |
| UW    | GM12872   | CTCF       | 0.847288     | 34212   | 0.34          | 15.09   |
| SYDH  | H1HESC    | RAD21      | 0.846410     | 35780   | 0.36          | 17.12   |
| UW    | BE2C      | CTCF       | 0.846211     | 41476   | 0.41          | 15.80   |
| UW    | HPF       | CTCF       | 0.845889     | 29441   | 0.29          | 14.13   |
| UW    | NHLF      | CTCF       | 0.845237     | 24971   | 0.25          | 11.64   |
| BROAD | NHDFAD    | CTCF       | 0.844702     | 33708   | 0.34          | 14.84   |
| UW    | SAEC      | CTCF       | 0.843178     | 27722   | 0.28          | 13.59   |
| BROAD | HSMMT     | CTCF       | 0.843109     | 39253   | 0.39          | 14.10   |
| BROAD | GM12878   | CTCF       | 0.842508     | 39752   | 0.40          | 14.28   |
| BROAD | NHLF      | CTCF       | 0.842394     | 30215   | 0.30          | 12.99   |
| UW    | HELAS3    | CTCF       | 0.842036     | 24028   | 0.24          | 11.95   |
| UW    | GM12864   | CTCF       | 0.841830     | 33480   | 0.33          | 14.86   |

Continued on next page

| Lab   | Cell line | Experiment     | BASSET AUPRC | $ v _0$ | $ v _0/M$ (%) | $ v _2$ |
|-------|-----------|----------------|--------------|---------|---------------|---------|
| UW    | SKNSHRA   | CTCF           | 0.841702     | 26551   | 0.27          | 13.96   |
| UW    | HCM       | CTCF           | 0.839966     | 42907   | 0.43          | 15.57   |
| UTA   | GLIOBLA   | CTCF           | 0.839859     | 37388   | 0.37          | 18.58   |
| UTA   | K562      | CTCF           | 0.838050     | 27610   | 0.28          | 16.98   |
| UW    | HUVEC     | CTCF           | 0.837666     | 23780   | 0.24          | 12.51   |
| UW    | K562      | CTCF           | 0.835751     | 30678   | 0.31          | 14.23   |
| UW    | GM12873   | CTCF           | 0.834805     | 36107   | 0.36          | 15.83   |
| UW    | HMEC      | CTCF           | 0.834803     | 36092   | 0.36          | 14.96   |
| BROAD | HEPG2     | CTCF           | 0.834631     | 36924   | 0.37          | 14.72   |
| BROAD | HSMM      | CTCF           | 0.833446     | 34415   | 0.34          | 15.13   |
| UW    | HEPG2     | CTCF           | 0.831350     | 31010   | 0.31          | 15.52   |
| UW    | HPAF      | CTCF           | 0.830419     | 40688   | 0.41          | 16.57   |
| UW    | AG09309   | CTCF           | 0.830321     | 31862   | 0.32          | 13.56   |
| BROAD | HELAS3    | CTCF           | 0.828969     | 49347   | 0.49          | 15.31   |
| UW    | BJ        | CTCF           | 0.828852     | 32555   | 0.33          | 13.39   |
| BROAD | NHEK      | CTCF           | 0.828230     | 37413   | 0.37          | 14.19   |
| UW    | HEE       | CTCF           | 0.828217     | 33823   | 0.34          | 13.55   |
| UW    | HAC       | CTCF           | 0.828210     | 36662   | 0.37          | 13.83   |
| UTA   | HELAS3    | CTCF           | 0.828109     | 25915   | 0.26          | 16.07   |
| UW    | AG04450   | CTCF           | 0.827331     | 32761   | 0.33          | 13.88   |
| UTA   | PROGFIB   | CTCF           | 0.826811     | 22840   | 0.23          | 14.38   |
| HAIB  | ECC1      | CTCFC          | 0.826438     | 15251   | 0.15          | 8.81    |
| BROAD | DND41     | CTCF           | 0.824320     | 38541   | 0.39          | 13.81   |
| HAIB  | H1HESC    | RAD21          | 0.823698     | 47411   | 0.47          | 22.20   |
| SYDH  | IMR90     | CTCFB          | 0.820777     | 26982   | 0.27          | 13.99   |
| UW    | AG09319   | CTCF           | 0.820556     | 33669   | 0.34          | 14.46   |
| UW    | HBMEC     | CTCF           | 0.819613     | 41152   | 0.41          | 16.62   |
| UW    | WI38      | CTCF           | 0.819609     | 25725   | 0.26          | 10.62   |
| UTA   | H1HESC    | CTCF           | 0.818739     | 22472   | 0.22          | 15.80   |
| UTA   | A549      | CTCF           | 0.817553     | 32700   | 0.33          | 17.81   |
| UW    | AG10803   | CTCF           | 0.817006     | 29517   | 0.30          | 13.69   |
| BROAD | OSTEOBL   | CTCF           | 0.816996     | 53644   | 0.54          | 16.04   |
| UW    | HCPE      | CTCF           | 0.816798     | 42276   | 0.42          | 16.83   |
| SYDH  | GM12878   | CTCFSC15914C20 | 0.815991     | 30691   | 0.31          | 15.49   |
| UTA   | MCF7      | CTCF           | 0.815467     | 49073   | 0.49          | 22.63   |
| BROAD | K562      | CTCF           | 0.815351     | 52427   | 0.52          | 15.60   |
| UW    | WERIRB1   | CTCF           | 0.815231     | 30972   | 0.31          | 15.58   |
| UTA   | MCF7      | CTCF           | 0.814259     | 37438   | 0.37          | 18.94   |
| UW    | AOAF      | CTCF           | 0.810198     | 25402   | 0.25          | 12.89   |
| UW    | CACO2     | CTCF           | 0.808883     | 28146   | 0.28          | 12.68   |
| UW    | AG04449   | CTCF           | 0.808085     | 24368   | 0.24          | 14.42   |
| SYDH  | K562      | CTCFB          | 0.807922     | 34266   | 0.34          | 15.56   |
| HAIB  | HEPG2     | RAD21          | 0.806753     | 31414   | 0.31          | 14.66   |
| UW    | NHDFNEO   | CTCF           | 0.805912     | 34150   | 0.34          | 13.07   |
| UTA   | FIBROBL   | CTCF           | 0.802580     | 24917   | 0.25          | 14.54   |
| HAIB  | K562      | CTCFC          | 0.800330     | 29034   | 0.29          | 14.24   |
| SYDH  | HEPG2     | RAD21          | 0.795326     | 24061   | 0.24          | 10.74   |
| SYDH  | GM12878   | RAD21          | 0.793772     | 22165   | 0.22          | 9.93    |
| UTA   | GM19240   | CTCF           | 0.787095     | 24254   | 0.24          | 14.44   |
| UTA   | GM19238   | CTCF           | 0.784621     | 28109   | 0.28          | 15.19   |

Continued on next page



| Lab  | Cell line | Experiment     | BASSET AUPRC | $ v _0$ | $ v _0/M$ (%) | $ v _2$ |
|------|-----------|----------------|--------------|---------|---------------|---------|
| UTA  | NHEK      | CTCF           | 0.782123     | 28029   | 0.28          | 15.70   |
| HAIB | T47D      | CTCFSC5916     | 0.780735     | 20119   | 0.20          | 9.44    |
| UTA  | GM12891   | CTCF           | 0.776692     | 23165   | 0.23          | 13.77   |
| SYDH | GM12878   | SMC3AB9263     | 0.775055     | 22604   | 0.23          | 9.36    |
| HAIB | GM12878   | RAD21          | 0.773313     | 19232   | 0.19          | 10.90   |
| UTA  | MCF7      | CTCF           | 0.771586     | 32289   | 0.32          | 17.54   |
| SYDH | IMR90     | RAD21          | 0.771096     | 21035   | 0.21          | 10.62   |
| UTA  | GM19239   | CTCF           | 0.770649     | 21921   | 0.22          | 12.29   |
| UTA  | GM12892   | CTCF           | 0.764533     | 27003   | 0.27          | 14.40   |
| SYDH | K562      | SMC3AB9263     | 0.764408     | 17833   | 0.18          | 8.29    |
| HAIB | K562      | RAD21          | 0.762473     | 17349   | 0.17          | 10.54   |
| UW   | HL60      | CTCF           | 0.760612     | 11834   | 0.12          | 6.43    |
| SYDH | HEPG2     | MAFKAB50322    | 0.756003     | 36764   | 0.37          | 16.31   |
| SYDH | HEK293    | POL2           | 0.750713     | 11423   | 0.11          | 2.57    |
| HAIB | SKNSHRA   | RAD21          | 0.748781     | 34221   | 0.34          | 14.81   |
| UTA  | MCF7      | CTCF           | 0.744677     | 33804   | 0.34          | 16.07   |
| UTA  | A549      | POL2           | 0.743474     | 13317   | 0.13          | 2.99    |
| UTA  | MCF7      | CTCF           | 0.737779     | 31703   | 0.32          | 15.80   |
| SYDH | HELAS3    | RAD21          | 0.732822     | 23726   | 0.24          | 9.90    |
| UTA  | GLIOBLA   | POL2           | 0.730622     | 12444   | 0.12          | 2.89    |
| SYDH | A549      | RAD21          | 0.726374     | 15727   | 0.16          | 8.17    |
| SYDH | GM10847   | POL2           | 0.725536     | 11162   | 0.11          | 2.82    |
| SYDH | K562      | RAD21          | 0.719791     | 11216   | 0.11          | 5.92    |
| UTA  | HUVEC     | POL2           | 0.710965     | 9848    | 0.10          | 2.62    |
| SYDH | GM18526   | POL2           | 0.704244     | 15927   | 0.16          | 3.59    |
| SYDH | HELAS3    | SMC3AB9263     | 0.703877     | 25410   | 0.25          | 9.28    |
| SYDH | MCF10AES  | CFOS           | 0.695666     | 52371   | 0.52          | 14.00   |
| SYDH | GM15510   | POL2           | 0.692228     | 18641   | 0.19          | 3.92    |
| SYDH | GM12878   | ZNF143166181AP | 0.691695     | 16121   | 0.16          | 6.52    |
| SYDH | MCF10AES  | CFOS           | 0.689921     | 41778   | 0.42          | 11.91   |
| SYDH | HEPG2     | SMC3AB9263     | 0.683574     | 21539   | 0.22          | 8.17    |
| SYDH | MCF10AES  | CFOS           | 0.678308     | 49334   | 0.49          | 12.33   |
| SYDH | MCF10AES  | CFOS           | 0.672546     | 37719   | 0.38          | 10.03   |
| SYDH | H1HESC    | ZNF143         | 0.665846     | 25229   | 0.25          | 8.50    |
| SYDH | GM18951   | POL2           | 0.662339     | 23305   | 0.23          | 4.19    |
| SYDH | K562      | NFYB           | 0.661296     | 9570    | 0.10          | 3.91    |
| HAIB | GM12878   | GABP           | 0.660956     | 5625    | 0.06          | 2.43    |
| HAIB | ECC1      | POL2           | 0.657365     | 19849   | 0.20          | 3.32    |
| UTA  | MCF7      | POL2           | 0.652882     | 18193   | 0.18          | 3.05    |
| HAIB | HEPG2     | TAF1           | 0.650101     | 16181   | 0.16          | 2.94    |
| SYDH | K562      | IRF1           | 0.649426     | 12976   | 0.13          | 3.16    |
| SYDH | K562      | POL2           | 0.647737     | 16308   | 0.16          | 3.35    |
| SYDH | GM12892   | POL2           | 0.645338     | 23295   | 0.23          | 4.12    |
| SYDH | HEPG2     | MAFKSC477      | 0.643218     | 24770   | 0.25          | 9.07    |
| UTA  | MCF7      | POL2           | 0.642949     | 15229   | 0.15          | 2.94    |
| SYDH | NB4       | POL2           | 0.641432     | 16158   | 0.16          | 3.31    |
| SYDH | K562      | POL2           | 0.640277     | 15063   | 0.15          | 2.99    |
| SYDH | K562      | POL2           | 0.635903     | 17161   | 0.17          | 3.22    |
| SYDH | K562      | ZNF143         | 0.634772     | 23343   | 0.23          | 7.50    |
| SYDH | HEPG2     | MAFFM8194      | 0.634067     | 25009   | 0.25          | 8.93    |

Continued on next page

| Lab   | Cell line | Experiment   | BASSET AUPRC | $ v _0$ | $ v _0/M$ (%) | $ v _2$ |
|-------|-----------|--------------|--------------|---------|---------------|---------|
| HAIB  | GM12878   | ELF1SC631    | 0.631869     | 20946   | 0.21          | 5.37    |
| HAIB  | H1HESC    | TAF1         | 0.627966     | 21837   | 0.22          | 3.08    |
| HAIB  | HEPG2     | GABP         | 0.627412     | 9290    | 0.09          | 3.07    |
| SYDH  | HEPG2     | CEBPB        | 0.625633     | 34970   | 0.35          | 14.15   |
| SYDH  | K562      | POL2         | 0.624054     | 15843   | 0.16          | 3.14    |
| SYDH  | IMR90     | MAFK         | 0.620883     | 25154   | 0.25          | 8.57    |
| SYDH  | GM18505   | POL2         | 0.618220     | 24625   | 0.25          | 3.97    |
| UTA   | HELAS3    | POL2         | 0.617348     | 19384   | 0.19          | 3.25    |
| UTA   | PROGFIB   | POL2         | 0.617226     | 14761   | 0.15          | 2.91    |
| SYDH  | GM19099   | POL2         | 0.606235     | 22799   | 0.23          | 4.01    |
| SYDH  | GM19193   | POL2         | 0.604915     | 24050   | 0.24          | 3.91    |
| SYDH  | K562      | POL2         | 0.602457     | 15110   | 0.15          | 2.90    |
| HAIB  | SKNSH     | TAF1         | 0.601160     | 11185   | 0.11          | 2.76    |
| SYDH  | HCT116    | POL2         | 0.598756     | 17455   | 0.17          | 2.72    |
| SYDH  | PBDE      | POL2         | 0.596470     | 22492   | 0.22          | 3.29    |
| HAIB  | K562      | TAF1         | 0.594640     | 13400   | 0.13          | 3.11    |
| UTA   | MCF7      | POL2         | 0.587761     | 14677   | 0.15          | 2.73    |
| SYDH  | MCF10AES  | POL2         | 0.581721     | 22034   | 0.22          | 3.45    |
| BROAD | K562      | PLU1         | 0.578953     | 19126   | 0.19          | 2.78    |
| SYDH  | IMR90     | CEBPB        | 0.577892     | 44228   | 0.44          | 14.66   |
| HAIB  | A549      | CREB1SC240   | 0.576054     | 13155   | 0.13          | 3.07    |
| UTA   | K562      | POL2         | 0.575441     | 19966   | 0.20          | 3.30    |
| HAIB  | GM12878   | PU1          | 0.574256     | 27757   | 0.28          | 9.34    |
| SYDH  | GM12878   | POL2         | 0.573648     | 23803   | 0.24          | 3.93    |
| UTA   | GM12878   | POL2         | 0.572056     | 17552   | 0.18          | 3.00    |
| HAIB  | GM12878   | NRSF         | 0.568899     | 5888    | 0.06          | 3.82    |
| BROAD | K562      | PHF8A301772A | 0.566331     | 27457   | 0.27          | 2.88    |
| SYDH  | RAJI      | POL2         | 0.564973     | 21621   | 0.22          | 3.36    |
| SYDH  | HEPG2     | POL2         | 0.563102     | 18212   | 0.18          | 2.71    |
| HAIB  | K562      | YY1          | 0.558414     | 10704   | 0.11          | 2.79    |
| HAIB  | A549      | POL2         | 0.555363     | 31308   | 0.31          | 3.68    |
| HAIB  | A549      | POL2         | 0.553825     | 29976   | 0.30          | 3.58    |
| HAIB  | GM12878   | YY1SC281     | 0.553334     | 26103   | 0.26          | 5.34    |
| SYDH  | GM12878   | POL2         | 0.552473     | 11117   | 0.11          | 2.41    |
| HAIB  | GM12891   | PU1          | 0.551608     | 28912   | 0.29          | 9.97    |
| HAIB  | GM12878   | TAF1         | 0.551273     | 12105   | 0.12          | 2.98    |
| SYDH  | A549      | CEBPB        | 0.551046     | 26389   | 0.26          | 9.72    |
| SYDH  | HUVEC     | CFOS         | 0.550936     | 42775   | 0.43          | 7.57    |
| HAIB  | A549      | TAF1         | 0.550319     | 11038   | 0.11          | 2.08    |
| HAIB  | GM12892   | POL2         | 0.548292     | 23439   | 0.23          | 3.42    |
| HAIB  | HELAS3    | TAF1         | 0.547530     | 14406   | 0.14          | 2.81    |
| HAIB  | HEPG2     | POL24H8      | 0.547414     | 18782   | 0.19          | 3.01    |
| SYDH  | HEPG2     | JUND         | 0.545643     | 23439   | 0.23          | 5.68    |
| SYDH  | HELAS3    | HAE2F1       | 0.544870     | 9314    | 0.09          | 1.47    |
| SYDH  | HELAS3    | POL2         | 0.543185     | 29222   | 0.29          | 3.11    |
| HAIB  | GM12892   | TAF1         | 0.542027     | 8249    | 0.08          | 2.23    |
| SYDH  | K562      | MAZAB85725   | 0.541193     | 33691   | 0.34          | 6.34    |
| SYDH  | MCF10AES  | POL2         | 0.541022     | 25900   | 0.26          | 3.53    |
| SYDH  | H1HESC    | MAFK         | 0.540650     | 8262    | 0.08          | 2.09    |
| HAIB  | A549      | ETS1         | 0.539878     | 6635    | 0.07          | 2.60    |

Continued on next page

| Lab  | Cell line | Experiment  | BASSET AUPRC | $ v _0$ | $ v _0/M$ (%) | $ v _2$ |
|------|-----------|-------------|--------------|---------|---------------|---------|
| SYDH | GM12891   | POL2        | 0.538971     | 24040   | 0.24          | 3.79    |
| HAIB | K562      | GABP        | 0.535852     | 12143   | 0.12          | 3.59    |
| HAIB | K562      | E2F6        | 0.535787     | 20429   | 0.20          | 2.89    |
| HAIB | HEPG2     | YY1SC281    | 0.535256     | 17564   | 0.18          | 3.27    |
| HAIB | HCT116    | POL24H8     | 0.534399     | 29439   | 0.29          | 4.18    |
| SYDH | HELAS3    | ELK4        | 0.533836     | 6984    | 0.07          | 2.00    |
| HAIB | U87       | NRSF        | 0.533645     | 10740   | 0.11          | 3.53    |
| SYDH | H1HESC    | TBP         | 0.533586     | 17933   | 0.18          | 3.13    |
| SYDH | GM12878   | ELK112771   | 0.532557     | 5585    | 0.06          | 1.90    |
| UTA  | H1HESC    | POL2        | 0.528904     | 15666   | 0.16          | 2.28    |
| HAIB | HEPG2     | POL2        | 0.527603     | 26528   | 0.27          | 3.51    |
| HAIB | GM12878   | PMLSC71910  | 0.523565     | 21007   | 0.21          | 3.16    |
| HAIB | HEPG2     | NRSF        | 0.522989     | 11697   | 0.12          | 3.82    |
| HAIB | K562      | ELF1SC631   | 0.521651     | 20676   | 0.21          | 5.35    |
| SYDH | GM12878   | NFYB        | 0.521437     | 14633   | 0.15          | 3.58    |
| HAIB | GM12891   | TAF1        | 0.520083     | 10825   | 0.11          | 2.70    |
| HAIB | HUVEC     | POL2        | 0.519612     | 24168   | 0.24          | 3.11    |
| HAIB | A549      | ELF1        | 0.516848     | 8792    | 0.09          | 2.24    |
| HAIB | PFSK1     | FOXP2       | 0.514938     | 15908   | 0.16          | 2.79    |
| SYDH | MCF10AES  | E2F4        | 0.514526     | 12559   | 0.13          | 2.58    |
| SYDH | HELAS3    | NFYA        | 0.513807     | 5483    | 0.05          | 1.98    |
| SYDH | K562      | HMGN3       | 0.513410     | 18241   | 0.18          | 2.26    |
| SYDH | HELAS3    | NFYB        | 0.512540     | 6653    | 0.07          | 2.22    |
| SYDH | HUVEC     | CJUN        | 0.510520     | 20080   | 0.20          | 4.26    |
| HAIB | HUVEC     | POL24H8     | 0.509722     | 35149   | 0.35          | 4.72    |
| HAIB | HEPG2     | ELF1SC631   | 0.509441     | 13489   | 0.13          | 3.73    |
| SYDH | K562      | MAFKAB50322 | 0.508412     | 13001   | 0.13          | 3.37    |
| HAIB | GM12891   | POL2        | 0.505543     | 17852   | 0.18          | 2.78    |
| SYDH | H1HESC    | USF2        | 0.503572     | 5202    | 0.05          | 2.27    |
| HAIB | H1HESC    | GABP        | 0.501419     | 5292    | 0.05          | 1.53    |
| SYDH | K562      | E2F4        | 0.500739     | 7900    | 0.08          | 1.74    |
| SYDH | K562      | MAFF        | 0.499311     | 17035   | 0.17          | 4.41    |
| SYDH | IMR90     | POL2        | 0.499139     | 21099   | 0.21          | 2.57    |
| HAIB | H1HESC    | USF1        | 0.498243     | 16631   | 0.17          | 6.39    |
| HAIB | K562      | MAX         | 0.494249     | 42934   | 0.43          | 5.98    |
| SYDH | HELAS3    | POL2S2      | 0.492278     | 14434   | 0.14          | 2.32    |
| HAIB | H1HESC    | NRSF        | 0.491469     | 8454    | 0.08          | 5.74    |
| SYDH | HELAS3    | MAZAB85725  | 0.489070     | 16019   | 0.16          | 2.24    |
| HAIB | HELAS3    | NRSF        | 0.488734     | 6360    | 0.06          | 4.97    |
| HAIB | GM12891   | YY1SC281    | 0.487772     | 11490   | 0.11          | 2.73    |
| HAIB | HEPG2     | SIN3AK20    | 0.487522     | 17653   | 0.18          | 2.53    |
| HAIB | HELAS3    | POL2        | 0.487393     | 28715   | 0.29          | 3.64    |
| HAIB | K562      | POL2        | 0.486825     | 36854   | 0.37          | 3.37    |
| SYDH | HEPG2     | MAX         | 0.486481     | 11059   | 0.11          | 1.92    |
| HAIB | GM12878   | SP1         | 0.486260     | 15317   | 0.15          | 3.48    |
| SYDH | HEPG2     | POL2        | 0.484689     | 20477   | 0.20          | 2.83    |
| HAIB | GM12892   | POL24H8     | 0.483645     | 20500   | 0.21          | 2.59    |
| HAIB | K562      | ETS1        | 0.483398     | 10444   | 0.10          | 2.37    |
| SYDH | GM12878   | MAZAB85725  | 0.483322     | 22411   | 0.22          | 3.16    |
| SYDH | HELAS3    | CJUN        | 0.478779     | 16492   | 0.16          | 2.98    |

Continued on next page

| Lab      | Cell line | Experiment     | BASSET AUPRC | $ v _0$ | $ v _0/M$ (%) | $ v _2$ |
|----------|-----------|----------------|--------------|---------|---------------|---------|
| SYDH     | K562      | CFOS           | 0.478299     | 5481    | 0.05          | 2.17    |
| SYDH     | HEPG2     | MXI1           | 0.477728     | 21106   | 0.21          | 3.26    |
| HAIB     | H1HESC    | POL2           | 0.476246     | 26239   | 0.26          | 2.59    |
| SYDH     | K562      | CEBPB          | 0.474134     | 28505   | 0.29          | 9.12    |
| HAIB     | U87       | POL24H8        | 0.473137     | 23582   | 0.24          | 3.29    |
| SYDH     | K562      | MAX            | 0.471849     | 29516   | 0.30          | 4.86    |
| HAIB     | A549      | GABP           | 0.471447     | 13855   | 0.14          | 3.02    |
| SYDH     | HELAS3    | CHD2           | 0.471053     | 19320   | 0.19          | 3.33    |
| SYDH     | K562      | E2F6           | 0.470723     | 16483   | 0.16          | 2.33    |
| HAIB     | GM12878   | EGR1           | 0.468941     | 10841   | 0.11          | 2.08    |
| SYDH     | HUVEC     | MAX            | 0.466519     | 6425    | 0.06          | 1.93    |
| HAIB     | GM12878   | RUNX3SC101553  | 0.466113     | 56840   | 0.57          | 8.61    |
| HAIB     | GM12878   | USF1           | 0.465793     | 7272    | 0.07          | 2.57    |
| HAIB     | K562      | USF1           | 0.464692     | 12871   | 0.13          | 4.61    |
| BROAD    | K562      | RBBP5A300109A  | 0.463994     | 20083   | 0.20          | 1.84    |
| SYDH     | K562      | TBP            | 0.463143     | 17767   | 0.18          | 3.22    |
| HAIB     | K562      | SIN3AK20       | 0.463116     | 8897    | 0.09          | 1.77    |
| SYDH     | K562      | CMYC           | 0.462873     | 32161   | 0.32          | 5.06    |
| SYDH     | A549      | MAX            | 0.461439     | 9266    | 0.09          | 1.72    |
| SYDH     | HELAS3    | MAX            | 0.458337     | 29171   | 0.29          | 4.12    |
| HAIB     | HEPG2     | USF1           | 0.457588     | 12887   | 0.13          | 3.90    |
| SYDH     | K562      | CCNT2          | 0.456697     | 21697   | 0.22          | 2.94    |
| SYDH     | GM12878   | MXI1           | 0.456679     | 19923   | 0.20          | 2.77    |
| HAIB     | GM12892   | YY1            | 0.456003     | 12740   | 0.13          | 2.83    |
| HAIB     | GM12891   | POL24H8        | 0.455418     | 17929   | 0.18          | 2.50    |
| SYDH     | HELAS3    | CEBPB          | 0.450802     | 39105   | 0.39          | 7.92    |
| SYDH     | NB4       | MAX            | 0.449059     | 28193   | 0.28          | 4.72    |
| SYDH     | HEPG2     | TBP            | 0.448004     | 13778   | 0.14          | 2.88    |
| HAIB     | HCT116    | YY1SC281       | 0.447206     | 9601    | 0.10          | 2.36    |
| UTA      | MCF7      | CMYC           | 0.446932     | 17429   | 0.17          | 2.52    |
| SYDH     | K562      | CMYC           | 0.446684     | 26346   | 0.26          | 3.95    |
| HAIB     | SKNSHRA   | YY1SC281       | 0.445929     | 13128   | 0.13          | 2.71    |
| HAIB     | H1HESC    | YY1SC281       | 0.445242     | 15591   | 0.16          | 2.65    |
| SYDH     | HELAS3    | JUND           | 0.444612     | 22640   | 0.23          | 4.23    |
| SYDH     | HEPG2     | MAZAB85725     | 0.444409     | 12934   | 0.13          | 1.88    |
| UTA      | MCF7      | CMYC           | 0.443654     | 24235   | 0.24          | 3.51    |
| HAIB     | A549      | USF1           | 0.441291     | 7881    | 0.08          | 2.59    |
| SYDH     | HEPG2     | CJUN           | 0.440671     | 8890    | 0.09          | 1.91    |
| HAIB     | SKNSHRA   | USF1SC8983     | 0.439829     | 12682   | 0.13          | 3.64    |
| SYDH     | GM12878   | MAX            | 0.439437     | 14531   | 0.15          | 2.21    |
| HAIB     | K562      | POL24H8        | 0.438629     | 19971   | 0.20          | 3.52    |
| HAIB     | PFSK1     | NRSF           | 0.435981     | 9928    | 0.10          | 4.63    |
| SYDH     | H1HESC    | SIN3ANB6001263 | 0.433869     | 26283   | 0.26          | 2.93    |
| UTA      | HEPG2     | POL2           | 0.432243     | 21612   | 0.22          | 2.23    |
| HAIB     | A549      | FOSL2          | 0.430795     | 23494   | 0.24          | 3.95    |
| HAIB     | SKNSH     | POL24H8        | 0.427949     | 22879   | 0.23          | 3.35    |
| SYDH     | HUVEC     | POL2           | 0.427119     | 11883   | 0.12          | 1.94    |
| HAIB     | K562      | YY1            | 0.426097     | 19380   | 0.19          | 3.54    |
| UCHICAGO | K562      | EFOS           | 0.425453     | 6855    | 0.07          | 1.91    |
| SYDH     | H1HESC    | CHD2           | 0.424343     | 6252    | 0.06          | 1.25    |

Continued on next page

| Lab  | Cell line | Experiment     | BASSET AUPRC | $ v _0$ | $ v _0/M$ (%) | $ v _2$ |
|------|-----------|----------------|--------------|---------|---------------|---------|
| SYDH | MCF7      | HAE2F1         | 0.423359     | 27514   | 0.28          | 2.20    |
| HAIB | K562      | SP1            | 0.422803     | 6215    | 0.06          | 1.58    |
| SYDH | K562      | JUND           | 0.420900     | 30409   | 0.30          | 5.93    |
| SYDH | HELAS3    | ZNF143         | 0.420784     | 5406    | 0.05          | 2.13    |
| HAIB | A549      | YY1C           | 0.420411     | 11293   | 0.11          | 2.20    |
| SYDH | GM12878   | POL2S2         | 0.420026     | 12996   | 0.13          | 1.84    |
| HAIB | GM12878   | POL2           | 0.419133     | 48007   | 0.48          | 3.33    |
| HAIB | PFSK1     | TAF1           | 0.415078     | 6236    | 0.06          | 1.35    |
| HAIB | K562      | PU1            | 0.411073     | 15386   | 0.15          | 4.70    |
| SYDH | GM12878   | CHD2AB68301    | 0.410210     | 16016   | 0.16          | 2.63    |
| SYDH | NB4       | CMYC           | 0.406744     | 23774   | 0.24          | 3.73    |
| HAIB | H1HESC    | TAF7SC101167   | 0.406696     | 10442   | 0.10          | 1.54    |
| SYDH | H1HESC    | CEBPB          | 0.405410     | 11800   | 0.12          | 3.73    |
| SYDH | MCF10AES  | STAT3          | 0.404351     | 33486   | 0.33          | 5.08    |
| HAIB | GM12878   | POL24H8        | 0.402366     | 31663   | 0.32          | 2.85    |
| HAIB | SKNSH     | NRSF           | 0.401931     | 7233    | 0.07          | 3.71    |
| HAIB | K562      | ZBTB7ASC34508  | 0.399912     | 19683   | 0.20          | 2.16    |
| HAIB | K562      | EGR1           | 0.399163     | 24881   | 0.25          | 3.28    |
| SYDH | MCF10AES  | STAT3          | 0.398512     | 29538   | 0.30          | 4.81    |
| SYDH | K562      | CHD2AB68301    | 0.398431     | 7834    | 0.08          | 2.01    |
| HAIB | SKNMC     | POL24H8        | 0.393543     | 21485   | 0.21          | 2.96    |
| HAIB | H1HESC    | POL24H8        | 0.391510     | 19419   | 0.19          | 1.99    |
| HAIB | K562      | CTCFLSC98982   | 0.391258     | 5891    | 0.06          | 2.85    |
| SYDH | MCF10AES  | STAT3          | 0.388008     | 31591   | 0.32          | 4.98    |
| HAIB | A549      | USF1           | 0.387810     | 6778    | 0.07          | 1.84    |
| HAIB | HEPG2     | FOXA1SC6553    | 0.386906     | 33656   | 0.34          | 5.34    |
| SYDH | MCF10AES  | STAT3          | 0.385338     | 25848   | 0.26          | 4.56    |
| HAIB | SKNSH     | NRSF           | 0.385146     | 14169   | 0.14          | 3.45    |
| SYDH | GM12891   | NFKB           | 0.383466     | 29206   | 0.29          | 4.56    |
| HAIB | H1HESC    | SP1            | 0.380258     | 12393   | 0.12          | 2.05    |
| SYDH | MCF10AES  | CMYC           | 0.379656     | 27000   | 0.27          | 4.33    |
| SYDH | HEPG2     | CEBPB          | 0.379397     | 11572   | 0.12          | 4.10    |
| HAIB | K562      | NRSF           | 0.379106     | 9598    | 0.10          | 4.30    |
| SYDH | GM12878   | USF2           | 0.377835     | 6661    | 0.07          | 2.16    |
| SYDH | HELAS3    | TBP            | 0.376722     | 17555   | 0.18          | 3.06    |
| UTA  | K562      | CMYC           | 0.372061     | 5833    | 0.06          | 1.68    |
| HAIB | K562      | ATF3           | 0.371010     | 10360   | 0.10          | 2.78    |
| SYDH | HELAS3    | MXI1AF4185     | 0.368398     | 12174   | 0.12          | 1.83    |
| HAIB | HEPG2     | FOSL2          | 0.367104     | 16407   | 0.16          | 3.44    |
| SYDH | K562      | CMYC           | 0.366773     | 21209   | 0.21          | 3.20    |
| SYDH | HELAS3    | MAFK           | 0.366364     | 9993    | 0.10          | 1.82    |
| SYDH | HELAS3    | P300SC584SC584 | 0.364830     | 18694   | 0.19          | 2.54    |
| HAIB | HEPG2     | SP1            | 0.364172     | 21711   | 0.22          | 3.58    |
| HAIB | K562      | PMLSC71910     | 0.362038     | 18655   | 0.19          | 2.75    |
| HAIB | K562      | FOSL1SC183     | 0.359258     | 6436    | 0.06          | 2.20    |
| HAIB | GM12878   | BCL11A         | 0.358333     | 12360   | 0.12          | 2.80    |
| SYDH | GM12878   | SIN3ANB6001263 | 0.356799     | 13694   | 0.14          | 1.61    |
| SYDH | K562      | CJUN           | 0.354626     | 5656    | 0.06          | 1.98    |
| SYDH | GM12878   | TBP            | 0.353883     | 15238   | 0.15          | 2.78    |
| HAIB | HEPG2     | FOXA1SC101058  | 0.353734     | 29596   | 0.30          | 4.83    |

Continued on next page

| Lab      | Cell line | Experiment     | BASSET AUPRC | $ v _0$ | $ v _0/M$ (%) | $ v _2$ |
|----------|-----------|----------------|--------------|---------|---------------|---------|
| HAIB     | HEPG2     | CEBPBSC150     | 0.348724     | 9795    | 0.10          | 3.67    |
| HAIB     | A549      | NRSF           | 0.348252     | 12999   | 0.13          | 3.65    |
| HAIB     | GM12878   | BATF           | 0.347600     | 18755   | 0.19          | 3.78    |
| HAIB     | A549      | USF1           | 0.347257     | 8140    | 0.08          | 2.22    |
| BROAD    | H1HESC    | RBBP5A300109A  | 0.343881     | 25833   | 0.26          | 1.35    |
| HAIB     | GM12892   | PAX5C20        | 0.343844     | 8182    | 0.08          | 1.34    |
| BROAD    | K562      | POL2B          | 0.341811     | 15495   | 0.15          | 1.86    |
| HAIB     | GM12878   | NFICSC81335    | 0.341187     | 33737   | 0.34          | 3.76    |
| SYDH     | HELAS3    | RFX5200401194  | 0.341053     | 15994   | 0.16          | 2.36    |
| HAIB     | GM12878   | IRF4SC6059     | 0.340861     | 14517   | 0.15          | 2.83    |
| HAIB     | GM12878   | POU2F2         | 0.336826     | 18566   | 0.19          | 2.97    |
| HAIB     | HEPG2     | FOXA2SC6554    | 0.336085     | 27428   | 0.27          | 4.48    |
| HAIB     | SKNSH     | SIN3AK20       | 0.336066     | 13855   | 0.14          | 1.95    |
| HAIB     | GM12878   | ATF2SC81188    | 0.335843     | 26054   | 0.26          | 3.55    |
| SYDH     | HELAS3    | USF2           | 0.329562     | 8429    | 0.08          | 1.85    |
| SYDH     | HELAS3    | E2F1           | 0.328842     | 5081    | 0.05          | 0.74    |
| SYDH     | MCF10AES  | CMYC           | 0.327448     | 19677   | 0.20          | 2.88    |
| HAIB     | HEPG2     | HNF4ASC8987    | 0.325563     | 13192   | 0.13          | 3.15    |
| SYDH     | K562      | UBTFSAB1404509 | 0.325086     | 14930   | 0.15          | 1.59    |
| UCHICAGO | K562      | EJUND          | 0.323401     | 26489   | 0.26          | 3.49    |
| UTA      | GM12878   | CMYC           | 0.322020     | 5627    | 0.06          | 0.63    |
| BROAD    | K562      | SAP3039731     | 0.320382     | 11693   | 0.12          | 1.16    |
| SYDH     | K562      | CMYC           | 0.318111     | 11312   | 0.11          | 2.06    |
| HAIB     | H1HESC    | EGR1           | 0.317297     | 7071    | 0.07          | 0.68    |
| HAIB     | K562      | CEBPBSC150     | 0.311232     | 18052   | 0.18          | 3.71    |
| HAIB     | H1HESC    | SIN3AK20       | 0.310984     | 7354    | 0.07          | 1.48    |
| SYDH     | GM15510   | NFKB           | 0.309530     | 13887   | 0.14          | 2.14    |
| BROAD    | K562      | HDAC1SC6298    | 0.308889     | 15009   | 0.15          | 1.08    |
| SYDH     | GM19099   | NFKB           | 0.308646     | 6705    | 0.07          | 1.71    |
| HAIB     | GM12878   | FOXM1SC502     | 0.307947     | 26561   | 0.27          | 2.91    |
| HAIB     | PANC1     | POL24H8        | 0.306956     | 11954   | 0.12          | 1.43    |
| HAIB     | HEPG2     | HNF4GSC6558    | 0.305644     | 14815   | 0.15          | 2.92    |
| HAIB     | HEPG2     | JUND           | 0.305335     | 14409   | 0.14          | 2.61    |
| SYDH     | K562      | TAL1SC12984    | 0.304212     | 18090   | 0.18          | 4.50    |
| HAIB     | HEPG2     | CEBPDSC636     | 0.303716     | 8698    | 0.09          | 1.82    |
| SYDH     | K562      | CORESTSC30189  | 0.303011     | 28293   | 0.28          | 3.98    |
| SYDH     | K562      | BHLHE40NB100   | 0.301552     | 19955   | 0.20          | 2.77    |
| HAIB     | GM12878   | EBF1SC137065   | 0.301285     | 24230   | 0.24          | 3.43    |

---

See Excel file

---

**Table S2: Numerical results for Figure 1.** We list all P-values used for the simulations of a) no enrichment, b) unsigned enrichment, and c) directional effects of minor alleles, with and without the 5-MAF-bin signed background model.

---

See Excel file

---

**Table S3: Numerical results for Figure 2.** We list a) estimated power, with standard errors, for both methods analyzed in Figure 2a, b) mean estimate of  $r_f$ , with standard error, for all values of  $r_f$  simulated, together with quantiles of the sampling distribution of our estimator.

---

See Excel file

---

**Table S4: List of molecular traits analyzed.** We list the set of molecular traits analyzed, with number of typed SNPs for each trait.

---

See Excel file

---

**Table S5: Details of analysis of molecular traits.** We list a) the set of 92 significant associations at per-trait FDR < 5% for the BLUEPRINT gene expression analysis, with laboratory, cell line, and TF listed for each significant annotation, along with estimated  $r_f$ , P-value, and whether the TF is known to be activating; b) the set of 22 significant associations at per-trait FDR < 5% for the NTR gene expression analysis; c) the side-by-side comparison of z-scores from the BLUEPRINT neutrophil expression analysis and the NTR analysis; d) the set of 13 significant associations at per-trait FDR < 5% for the BLUEPRINT H3K4me1 analysis; e) the set of 3 significant associations at per-trait FDR < 5% for the BLUEPRINT H3K27ac analysis; and f) the set of 40 significant associations at per-trait FDR < 10% for the BLUEPRINT methylation analysis.

---

See Excel file

---

**Table S6: List of diseases and complex traits analyzed.** We list the set of diseases and complex traits analyzed, with sample size, number of typed SNPs, and estimated SNP-heritability for each trait.

---

See Excel file

---

**Table S7: Details of analysis of 46 diseases and complex traits.** We list a) the set of 77 significant associations at per-trait FDR < 5% for the TF annotations, with laboratory, cell line, and transcription factor listed for each significant annotation, along with estimated  $r_f$  and P-value; b) the set of 4 significant associations at per-trait FDR < 5% for the alternate set of 382 annotations defined using the same set of SNPs with non-zero effects but with the directionality of effect determined by minor allele coding rather than predicted TF binding, for SNPs in the bottom quintile of the MAF spectrum; c) quantification of unsigned heritability explained by signed enrichments reported in (a). Specifically: because  $r_f^2$  for an annotation can never exceed the total proportion of heritability explained by the SNPs with nonzero values of the annotation, we computed for each association the ratio of estimated  $r_f^2$  to the proportion of SNPs with nonzero values of the annotation. We found that in some cases the signed signal was not only non-trivially different from zero but also substantial enough to imply an unsigned enrichment.

---

See Excel file

---

**Table S8: Numerical results for Figure 5.** For each result in the figure, we list i) the numerical values used to make the plot of  $\hat{\alpha}$  against  $Rv$ , and ii) the association summary statistics used to make the Manhattan plot. In the case of IRF1-Crohn's, we also list Z-scores for association with *IRF1* in whole blood from the NTR data set.

| SNP        | P(in causal set) | Causal post. prob. | Z       |
|------------|------------------|--------------------|---------|
| rs10189857 | 0.25             | 1                  | 8.0933  |
| rs356991   | 0.128176         | 0.512705           | 6.03    |
| rs168565   | 0.0366951        | 0.14678            | 5.9928  |
| rs6545816  | 0.154972         | 0.619888           | 5.4231  |
| rs6545817  | 0.0950247        | 0.380099           | 5.3862  |
| rs243071   | 0.25             | 1                  | -5.2992 |

**Table S9: Fine mapping of EDU signal at *BCL11A* locus.** We list the six SNPs in the 95% credible set when running the CAVIAR method with the parameter  $c = 4$ . rs10189857 is an intronic SNP in the *BCL11A* gene. (Results with  $c = 2$  and  $c = 3$  were similar.)



## Supplementary Figures

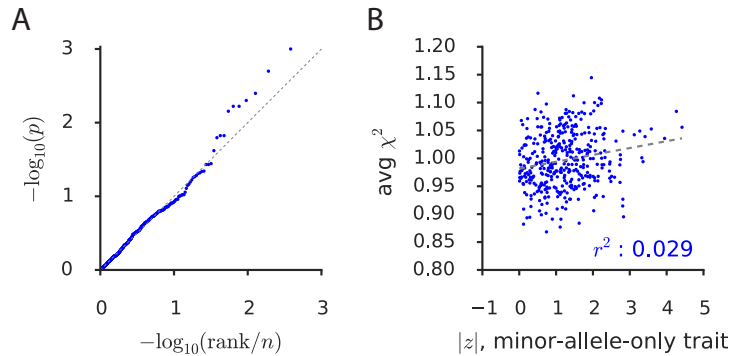

**Figure S1: Per-annotation analyses of null calibration.** (a) For each annotation, we used the Simes test<sup>42</sup> to assess the p-value threshold at which the Benjamini-Hochberg procedure would lead to any rejections among 1000 simulated phenotypes with no unsigned enrichment or functional correlation, and we visualized the resulting set of 382 p-values using a q-q plot. These p-values appear uniformly distributed, as would be expected in the scenario of proper calibration. (b) The average  $\chi^2$  statistic across the 1000 null simulations for each annotation, plotted against the magnitude of that annotation’s z-score for correlation with a 100%-heritable trait whose causal SNPs are exactly the bottom fifth of the MAF spectrum, with minor alleles always being trait-increasing. (Statistical significance of the trend is difficult to assess because many annotations are correlated, inducing a complex dependence structure among the 382 points on the plot.)

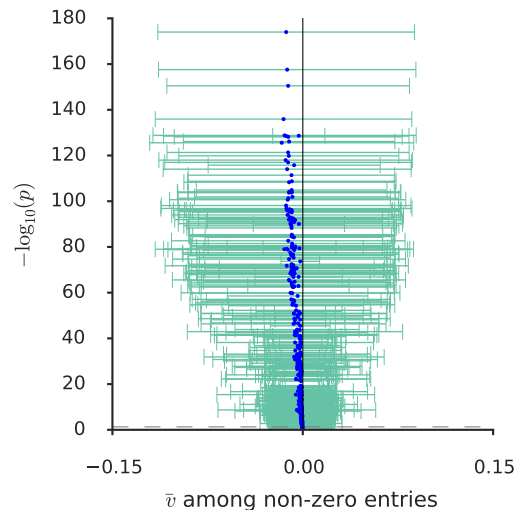

**Figure S2: Relationship of annotations to minor alleles.** For each annotation, we computed the mean and standard deviation of the predicted effect of the minor allele among all SNPs with non-zero values of the annotation. We then performed a chi-squared test for the mean being non-zero and plotted  $-\log_{10}(p)$  against the mean for each annotation. The green intervals show the standard deviation, in order to give a sense for the scale on which to interpret the mean-shift. The dotted gray line indicates the threshold for FDR significance. 373 of the 382 annotations exceeded this threshold.

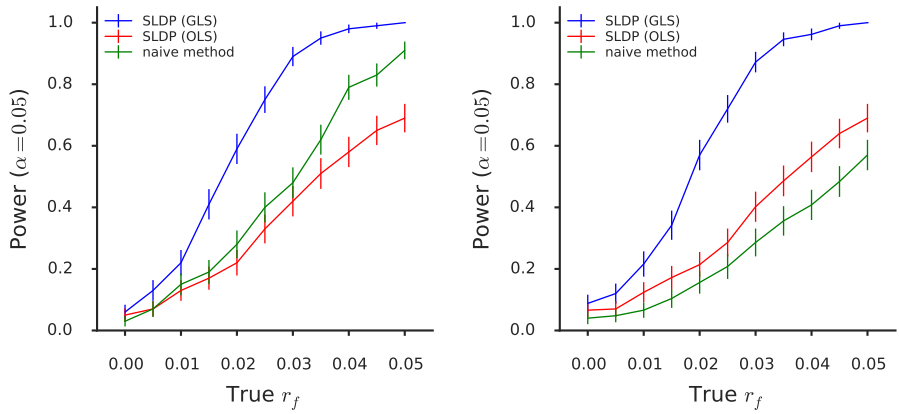

**Figure S3: Power comparison of signed LD profile regression to additional methods.** Power curves comparing signed LD profile regression using generalized least-squares (GLS; i.e., weighting) to both ordinary (i.e., unweighted) regression of the GWAS summary statistics on the signed LD profile as well as to a naive method that simply regresses the GWAS summary statistics on the raw annotation. (Left) power comparison with 19.5% of causal SNPs typed, (Right) power comparison with only 9.75% of causal SNPs typed. The real phenotypes analyzed all have at most 11.9% of causal SNPs typed. SLDP regression with default weights is the most powerful method in both regimes. Additionally, the power of the naive method suffers when fewer SNPs are typed, while the power of SLDP regression is far less sensitive to this change.

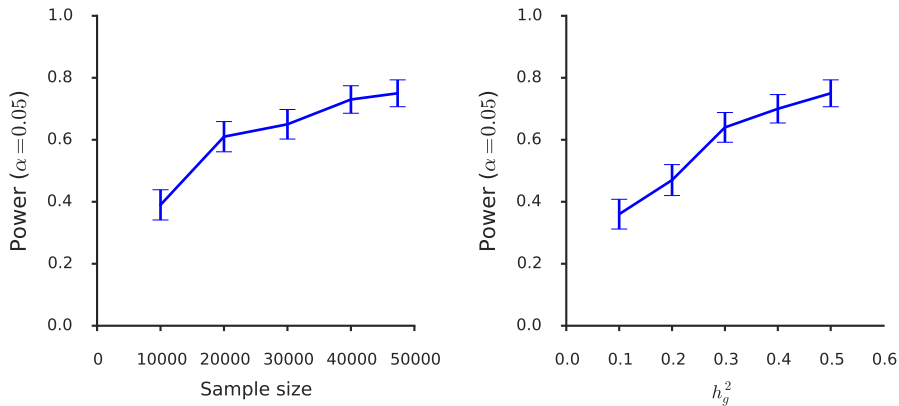

**Figure S4: Effect of sample size and heritability on power.** Power of signed LD profile regression as a function of (left) sample size, and (right) overall trait heritability, when proportion of heritability explained by the signed effect is held constant. Error bars indicate standard errors of power estimates.

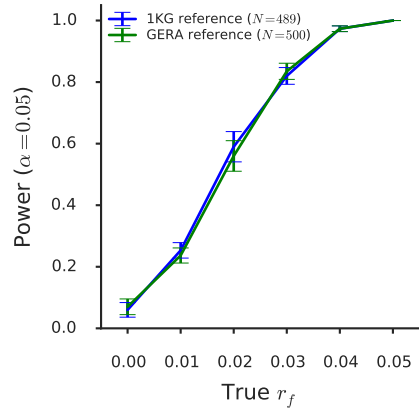

**Figure S5: Effect of reference panel on power.** Power of signed LD profile regression as a function of effect size as measured by  $r_f$ , with either a 1000G reference panel or a randomly chosen in-sample reference panel of comparable size. Error bars indicate standard errors of power estimates.

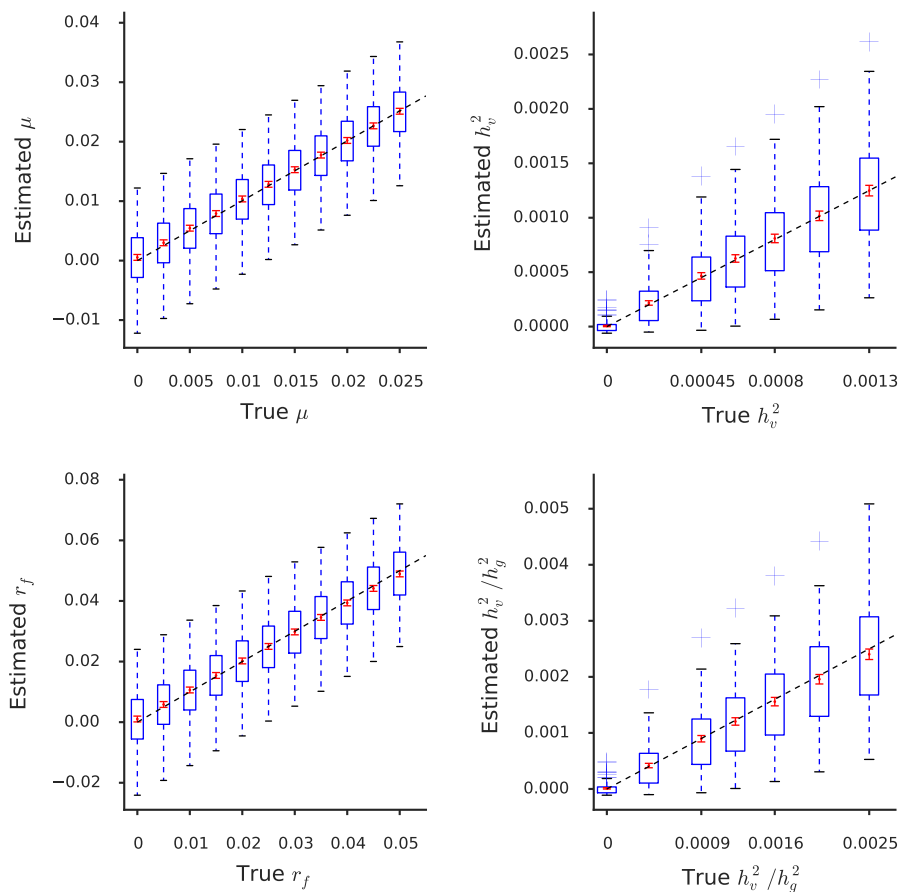

**Figure S6: Bias in estimation of additional estimands.** Assessments of the bias of signed LD profile regression with an out-of-sample reference panel in estimating  $\mu$ ,  $h_v^2$ ,  $r_f$ , and  $h_v^2/h_g^2$ . For definitions of these quantities, see Supplementary Note.

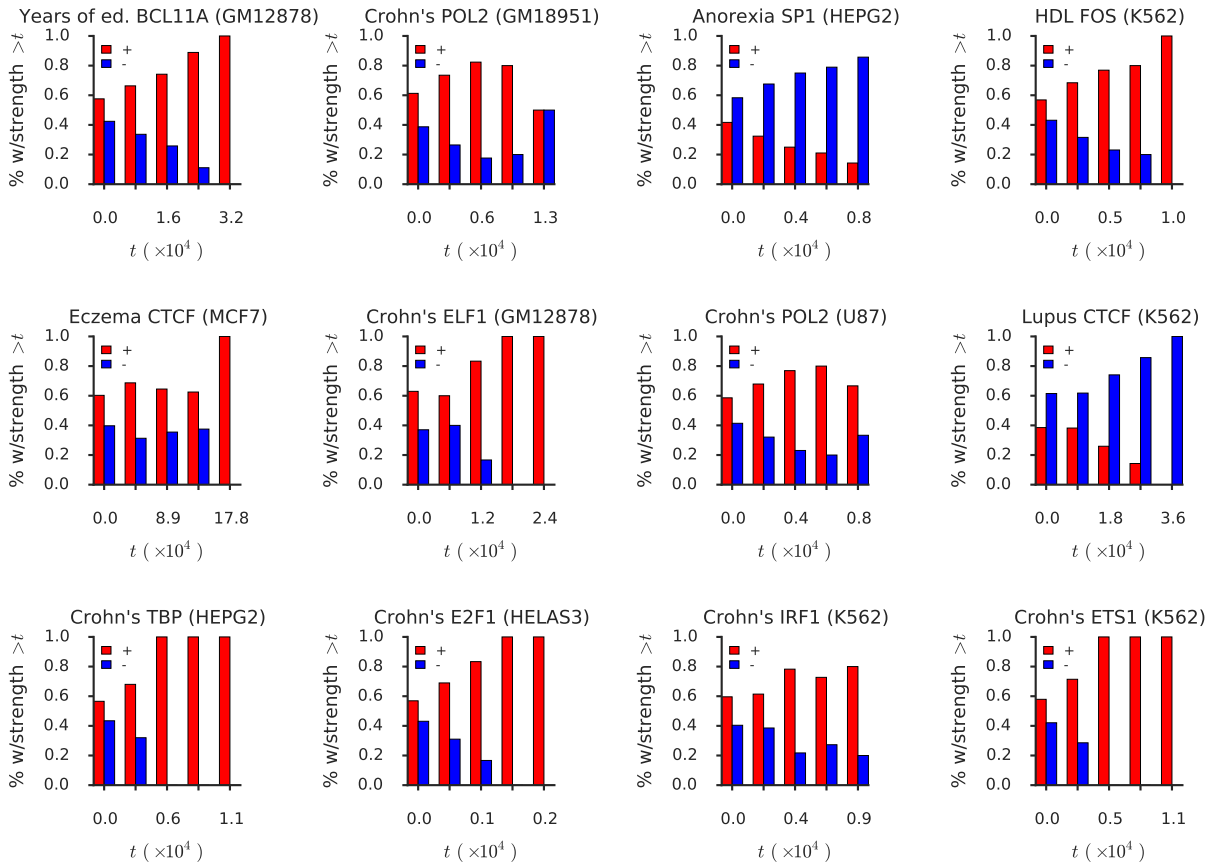

**Figure S7: Distribution of covariance between GWAS summary statistics and signed LD profile.** For each of our twelve independent results, we plot, for a variety of thresholds  $t$ , the fraction of the approximately 300 independent genomic blocks with  $|\text{cov}(\hat{\alpha}, Rv)| > t$  in which the covariance is positive versus negative. There is an excess of blocks in which sign of the covariance matches the genome-wide direction of effect. (We note that, as this figure illustrates, our results do not imply that the sign of the covariance matches the genome-wide direction of effect in *all* blocks.)

## Appendix: the distribution of GWAS summary statistics

We define the vector  $\hat{\alpha}$  of marginal correlations between SNPs and trait and derive its first two moments under a variety of relevant models, building up to the signed LD profile regression model.

### Definitions

Let  $M$  be the number of SNPs in the genome. Assume we have sampled  $N$  genotype vectors  $x_1, \dots, x_N$  i.i.d. from some population distribution, and that the phenotypes  $y_1, \dots, y_N$  of those individuals satisfy

$$y_n = x_n^T \beta + \varepsilon_n \quad (18)$$

where  $\beta \in \mathbb{R}^M$  is the vector of true causal SNP effects on trait, and  $\varepsilon_n \stackrel{iid}{\sim} \mathcal{N}(0, \sigma_e^2)$  are independent of the  $x_n$ . We assume throughout this section that genotypes are standardized in the population, i.e.,  $E(x_{nm}) = 0$  and  $E(x_{nm}^2) = 1$  for all  $n, m$ . We assume the same of the phenotype:  $E(y_n) = 0$  and  $E(y_n^2) = 1$  for all  $n$ . These assumptions are for expositional convenience.

Let  $X \in \mathbb{R}^{N \times M}$  be the matrix whose  $n$ -th row is  $x_n^T$ , and let  $Y \in \mathbb{R}^N$  be the vector whose  $n$ -th entry is  $y_n$ . The vector

$$\hat{\alpha} = \frac{X^T Y}{N}, \quad (19)$$

which has as its  $m$ -th entry the in-sample marginal correlation between SNP  $m$  and the trait, is the vector of *GWAS summary statistics*.

Having defined  $\hat{\alpha}$ , we now proceed to derive its first two moments, initially for fixed  $X$  and fixed  $\beta$ , and then for fixed  $\beta$  only. After doing so, we will impose the distributional assumption on  $\beta$  used in signed LD profile regression and, by marginalizing out  $\beta$  according to this distribution, we will obtain the result required for this paper.

### Derivation for fixed $X$ and fixed $\beta$

When both  $X$  and  $\beta$  are fixed, the following proposition<sup>43</sup> gives the moments of  $\hat{\alpha}$ .

**Proposition 1.** *Under the model defined above,  $\hat{\alpha}$  satisfies*

$$\hat{\alpha} | X, \beta \sim \mathcal{N} \left( \hat{R} \beta, \sigma_e^2 \frac{\hat{R}}{N} \right) \quad (20)$$

where  $\hat{R} = X^T X / N$  is the sample covariance matrix of the genotypes.

*Proof.* Let  $\varepsilon \in \mathbb{R}^N$  be the vector whose  $n$ -th entry is  $\varepsilon_n$ . When  $X$  and  $\beta$  are both fixed, it is easy to see that

$$\hat{\alpha} = \frac{1}{N} X^T Y \quad (21)$$

$$= \frac{1}{N} X^T (X^T \beta + \varepsilon) \quad (22)$$

$$= \hat{R} \beta + \frac{1}{N} X^T \varepsilon. \quad (23)$$

The result follows from normality of  $\varepsilon$ , together with  $E(\varepsilon) = 0$ , and  $\text{var}(X^T \varepsilon / N) = \sigma_e^2 X^T X / N^2 = \sigma_e^2 \hat{R} / N$ .  $\square$

### Derivation for random $X$ and fixed $\beta$

When working with summary statistics, it is desirable to explicitly model the relationship between the unobserved individuals and the LD reference panel by assuming the individuals were drawn from a population distribution whose LD properties we are given by the reference panel. The following result states the moments of  $\hat{\alpha}$  when we do so. We prove the result assuming Gaussian genotypes, but it can be shown to be robust to this assumption provided there is a lower bound on minor allele frequency relative to sample size.

**Proposition 2.** *Under the model defined above and assuming Gaussian genotypes,  $\hat{\alpha}$  satisfies*

$$\hat{\alpha}|\beta \sim \left[ R\beta, \frac{1}{N} (R + R\beta\beta^T R) \right] \quad (24)$$

where  $R = \text{cov}(x_n) \in \mathbb{R}^{M \times M}$  is the population covariance matrix of the genotypes, and the notation  $[\cdot, \cdot]$  is used to specify the mean and covariance of the distribution without specifying any higher moments.

*Proof.* Application of the law of total expectation to the result from Proposition 1 readily gives

$$E(\hat{\alpha}|\beta) = E(E(\hat{\alpha}|X, \beta)|\beta) \quad (25)$$

$$= E(\hat{R}\beta|\beta) \quad (26)$$

$$= R\beta. \quad (27)$$

Application of the law of total covariance yields

$$\text{cov}(\hat{\alpha}|\beta) = E(\text{cov}(\hat{\alpha}|X, \beta)|\beta) + \text{cov}(E(\hat{\alpha}|X, \beta)|\beta) \quad (28)$$

$$\sigma_e^2 \frac{\hat{R}}{N} + \text{cov}(\hat{R}\beta|\beta). \quad (29)$$

It is left then only to analyze  $\text{cov}(\hat{R}\beta|\beta) = E(\hat{R}\beta\beta^T \hat{R}) - R\beta\beta^T R$ . To do so, we note that

$$\text{cov}(\hat{R}\beta|\beta)_{mm'} = \left( E(\hat{R}\beta\beta^T \hat{R}) - R\beta\beta^T R \right)_{mm'} \quad (30)$$

$$= \sum_{i,j} \left( E(\hat{R}_{mi}\beta_i\beta_j\hat{R}_{jm'}) - R_{mi}\beta_i\beta_j R_{jm'} \right) \quad (31)$$

$$= \sum_{i,j} \beta_i\beta_j \left( E(\hat{R}_{mi}\hat{R}_{m'j}) - R_{mi}R_{m'j} \right) \quad (32)$$

$$= \frac{1}{N} \sum_{i,j} \beta_i\beta_j (R_{mm'}R_{ij} + R_{mj}R_{m'i}) \quad (33)$$

$$= \frac{1}{N} R_{mm'} \sum_{i,j} \beta_i\beta_j R_{ij} + \frac{1}{N} \sum_{i,j} \beta_i\beta_j R_{mj}R_{m'i} \quad (34)$$

$$= \frac{1}{N} R_{mm'} \beta^T R \beta + \frac{1}{N} \sum_{i,j} \beta_i\beta_j R_{mj}R_{m'i} \quad (35)$$

where Equation 33 follows from the fact that for Gaussian genotypes, Isselis' theorem implies that

$$E(\hat{R}_{mi}\hat{R}_{m'j}) = R_{mi}R_{m'j} + \frac{1}{N}(R_{mm'}R_{ij} + R_{mj}R_{m'i}). \quad (36)$$

The result of this argument can be summarized across all pairs of SNPs  $m, m'$  by

$$\text{cov}(\hat{R}\beta|\beta) = \frac{1}{N} ((\beta^T R \beta)R + R\beta\beta^T R), \quad (37)$$

whereupon noticing that  $\beta^T R \beta + \sigma_e^2 = \text{var}(y_n) = 1$  completes the proof.  $\square$

**Corollary 1.** *Under the model defined above,  $\hat{\alpha}$  approximately satisfies*

$$\hat{\alpha}|\beta \sim \left[ R\beta, \frac{R}{N} \right] \quad (38)$$

where  $R = \text{cov}(x_n) \in \mathbb{R}^{M \times M}$  is the population covariance matrix of the genotypes.

*Proof.* For typical  $\beta$  it can be shown that  $\beta\beta^T$  will be close to a scalar multiple of the identity. In this case, taking traces shows that the term  $R\beta\beta^T R/N$  in Proposition 2 will be negligible compared to the  $R/N$  term.  $\square$

## Derivation for random $X$ and random $\beta$

We now assume the full signed LD profile regression model, i.e., we fix some signed annotation  $v \in \mathbb{R}^M$ , and let  $\beta \sim [\mu v, \sigma^2]$ . Under this model, we have the following result.

**Theorem 1.** *If  $\beta \sim [\mu v, \sigma^2]$  for some  $v \in \mathbb{R}^M$  and  $\sigma^2 > 0$ , then  $\hat{\alpha}$  approximately satisfies*

$$\hat{\alpha}|v \sim \left[ \mu R v, \sigma^2 R^2 + \frac{R}{N} \right] \quad (39)$$

where  $R = \text{cov}(x_n) \in \mathbb{R}^{M \times M}$  is the population covariance matrix of the genotypes.

*Proof.* The law of total expectation applied to the result of Corollary 1 yields  $E(\hat{\alpha}|v) = \mu R v$  as desired. The law of total covariance yields

$$\text{cov}(\hat{\alpha}|v) \approx E(\text{cov}(\hat{\alpha}|\beta)|v) + \text{cov}(E(\hat{\alpha}|\beta)|v) \quad (40)$$

$$= \frac{R}{N} + \text{cov}(R\beta|v) \quad (41)$$

$$= \frac{R}{N} + R \text{cov}(\beta|v) R \quad (42)$$

$$= \frac{R}{N} + \sigma^2 R^2 \quad (43)$$

as desired. □

## References

- [1] Brendan Bulik-Sullivan et al. “An Atlas of Genetic Correlations across Human Diseases and Traits”. In: *Nature genetics* 47.11 (Nov. 2015), pp. 1236–1241. ISSN: 1061-4036. DOI: 10.1038/ng.3406. pmid: 26414676. URL: <http://www.ncbi.nlm.nih.gov/pmc/articles/PMC4797329/>.
- [2] Hilary K. Finucane et al. “Partitioning Heritability by Functional Annotation Using Genome-Wide Association Summary Statistics”. In: *Nature Genetics* 47.11 (Nov. 2015), pp. 1228–1235. ISSN: 1061-4036. DOI: 10.1038/ng.3404. URL: <http://www.nature.com/ng/journal/v47/n11/full/ng.3404.html#/introduction> (visited on 06/17/2017).
- [3] Tomaz Berisa and Joseph K. Pickrell. “Approximately Independent Linkage Disequilibrium Blocks in Human Populations”. In: *Bioinformatics* 32.2 (Jan. 15, 2016), pp. 283–285. ISSN: 1367-4803. DOI: 10.1093/bioinformatics/btv546. pmid: 26395773. URL: <http://www.ncbi.nlm.nih.gov/pmc/articles/PMC4731402/>.
- [4] Armin Schoech et al. “Quantification of Frequency-Dependent Genetic Architectures and Action of Negative Selection in 25 UK Biobank Traits”. In: *bioRxiv* (Sept. 13, 2017), p. 188086. DOI: 10.1101/188086. URL: <https://www.biorxiv.org/content/early/2017/09/13/188086> (visited on 10/02/2017).
- [5] Kathrin Davari et al. “Rapid Genome-Wide Recruitment of RNA Polymerase II Drives Transcription, Splicing, and Translation Events during T Cell Responses”. In: *Cell Reports* 19.3 (Apr. 18, 2017), pp. 643–654. ISSN: 2211-1247. DOI: 10.1016/j.celrep.2017.03.069. pmid: 28423325.
- [6] Ginger W. Muse et al. “RNA Polymerase Is Poised for Activation across the Genome”. In: *Nature Genetics* 39.12 (Dec. 2007), pp. 1507–1511. ISSN: 1061-4036. DOI: 10.1038/ng.2007.21. URL: <http://www.nature.com/ng/journal/v39/n12/full/ng.2007.21.html?foxtrotcallback=true> (visited on 10/12/2017).
- [7] Jie Xu et al. “Transcriptional Pausing Controls A Rapid Antiviral Innate Immune Response In *Drosophila*”. In: *Cell host & microbe* 12.4 (Oct. 18, 2012), pp. 531–543. ISSN: 1931-3128. DOI: 10.1016/j.chom.2012.08.011. pmid: 23084920. URL: <http://www.ncbi.nlm.nih.gov/pmc/articles/PMC3479682/>.
- [8] Cory Y. McLean et al. “GREAT Improves Functional Interpretation of Cis-Regulatory Regions”. In: *Nature Biotechnology* 28.5 (May 2010), pp. 495–501. ISSN: 1546-1696. DOI: 10.1038/nbt.1630. pmid: 20436461.

- [9] Alice S. Chen-Plotkin et al. “Decreased Association of the Transcription Factor Sp1 with Genes Down-regulated in Huntington’s Disease”. In: *Neurobiology of Disease* 22.2 (May 2006), pp. 233–241. ISSN: 0969-9961. DOI: 10.1016/j.nbd.2005.11.001. pmid: 16442295.
- [10] Montserrat Fusté et al. “Reduced Expression of SP1 and SP4 Transcription Factors in Peripheral Blood Mononuclear Cells in First-Episode Psychosis”. In: *Journal of Psychiatric Research* 47.11 (Nov. 2013), pp. 1608–1614. ISSN: 1879-1379. DOI: 10.1016/j.jpsychires.2013.07.019. pmid: 23941741.
- [11] X. Pan et al. “Insulin Deprivation Leads to Deficiency of Sp1 Transcription Factor in H-411E Hepatoma Cells and in Streptozotocin-Induced Diabetic Ketoacidosis in the Rat”. In: *Endocrinology* 142.4 (Apr. 2001), pp. 1635–1642. ISSN: 0013-7227. DOI: 10.1210/endo.142.4.8083. pmid: 11250945.
- [12] Dag Yasui, Jacob Peedicayil, and Dennis R. Grayson. *Neuropsychiatric Disorders and Epigenetics*. Google-Books-ID: \_dycBAAAQBAJ. Academic Press, Nov. 15, 2016. 446 pp. ISBN: 978-0-12-800527-9.
- [13] Xiaomei Zhang et al. “Hypermethylation of Sp1 Binding Site Suppresses Hypothalamic POMC in Neonates and May Contribute to Metabolic Disorders in Adults: Impact of Maternal Dietary CLAs”. In: *Diabetes* 63.5 (May 2014), pp. 1475–1487. ISSN: 1939-327X. DOI: 10.2337/db13-1221. pmid: 24379351.
- [14] Guoqing Yang et al. “FoxO1 Inhibits Leptin Regulation of Pro-Opiomelanocortin Promoter Activity by Blocking STAT3 Interaction with Specificity Protein 1”. In: *The Journal of Biological Chemistry* 284.6 (Feb. 6, 2009), pp. 3719–3727. ISSN: 0021-9258. DOI: 10.1074/jbc.M804965200. pmid: 19049975.
- [15] M. J. Moreno-Aliaga et al. “Sp1-Mediated Transcription Is Involved in the Induction of Leptin by Insulin-Stimulated Glucose Metabolism”. In: *Journal of Molecular Endocrinology* 38.5 (May 2007), pp. 537–546. ISSN: 1479-6813. DOI: 10.1677/JME-06-0034. pmid: 17496155.
- [16] Latifa Bakiri et al. “Liver Carcinogenesis by FOS-Dependent Inflammation and Cholesterol Dysregulation”. In: *Journal of Experimental Medicine* (Mar. 29, 2017), jem.20160935. ISSN: 0022-1007, 1540-9538. DOI: 10.1084/jem.20160935. pmid: 28356389. URL: <http://jem.rupress.org/content/early/2017/03/28/jem.20160935> (visited on 10/12/2017).
- [17] Fabian Bartz et al. “Identification of Cholesterol-Regulating Genes by Targeted RNAi Screening”. In: *Cell Metabolism* 10.1 (July 8, 2009), pp. 63–75. ISSN: 1550-4131. DOI: 10.1016/j.cmet.2009.05.009. URL: <http://www.sciencedirect.com/science/article/pii/S1550413109001570>.
- [18] J. Kálmán et al. “High Cholesterol Diet down Regulates the Activity of Activator Protein-1 but Not Nuclear Factor-Kappa B in Rabbit Brain”. In: *Life Sciences* 68.13 (Feb. 16, 2001), pp. 1495–1503. ISSN: 0024-3205. pmid: 11253166.
- [19] Birgit Knebel et al. “A Mutation in the C-Fos Gene Associated with Congenital Generalized Lipodystrophy”. In: *Orphanet Journal of Rare Diseases* 8 (Aug. 7, 2013), p. 119. ISSN: 1750-1172. DOI: 10.1186/1750-1172-8-119. URL: <https://doi.org/10.1186/1750-1172-8-119>.
- [20] Tae-Gyun Kim et al. “CCCTC-Binding Factor Controls the Homeostatic Maintenance and Migration of Langerhans Cells”. In: *The Journal of Allergy and Clinical Immunology* 136.3 (Sept. 2015), pp. 713–724. ISSN: 1097-6825. DOI: 10.1016/j.jaci.2015.03.033. pmid: 25936568.
- [21] Chen-Feng Qi et al. “CTCF Functions as a Critical Regulator of Cell-Cycle Arrest and Death after Ligation of the B Cell Receptor on Immature B Cells”. In: *Proceedings of the National Academy of Sciences of the United States of America* 100.2 (Jan. 21, 2003), pp. 633–638. ISSN: 0027-8424. DOI: 10.1073/pnas.0237127100. pmid: 12524457.
- [22] Verónica Torrano et al. “CTCF Regulates Growth and Erythroid Differentiation of Human Myeloid Leukemia Cells”. In: *The Journal of Biological Chemistry* 280.30 (July 29, 2005), pp. 28152–28161. ISSN: 0021-9258. DOI: 10.1074/jbc.M501481200. pmid: 15941718.
- [23] Lylia Ouboussad, Sarah Kreuz, and Pascal F. Lefevre. “CTCF Depletion Alters Chromatin Structure and Transcription of Myeloid-Specific Factors”. In: *Journal of Molecular Cell Biology* 5.5 (Oct. 2013), pp. 308–322. ISSN: 1759-4685. DOI: 10.1093/jmcb/mjt023. pmid: 23933634.
- [24] Tatjana Nikolic et al. “The DNA-Binding Factor Ctfc Critically Controls Gene Expression in Macrophages”. In: *Cellular and Molecular Immunology* 11.1 (Jan. 2014), pp. 58–70. ISSN: 1672-7681. DOI: 10.1038/cmi.2013.41. pmid: 24013844. URL: <http://www.ncbi.nlm.nih.gov/pmc/articles/PMC4002140/>.



- [25] Benjamin Joachim Schmiedel et al. “17q21 Asthma-Risk Variants Switch CTCF Binding and Regulate IL-2 Production by T Cells”. In: *Nature Communications* 7 (Nov. 16, 2016), p. 13426. ISSN: 2041-1723. DOI: 10.1038/ncomms13426. URL: <http://www.nature.com/ncomms/2016/161116/ncomms13426/full/ncomms13426.html> (visited on 05/03/2017).
- [26] Maria Noutsou et al. “The Cohesin Complex Is Necessary for Epidermal Progenitor Cell Function through Maintenance of Self-Renewal Genes”. In: *Cell Reports* 20.13 (Sept. 26, 2017), pp. 3005–3013. ISSN: 2211-1247. DOI: 10.1016/j.celrep.2017.09.003. pmid: 28954219. URL: [http://www.cell.com/cell-reports/abstract/S2211-1247\(17\)31264-0](http://www.cell.com/cell-reports/abstract/S2211-1247(17)31264-0) (visited on 10/12/2017).
- [27] Yoon-Jeong Kim et al. “Genome-Wide Methylation Profiling of the Bronchial Mucosa of Asthmatics: Relationship to Atopy”. In: *BMC Medical Genetics* 14 (Mar. 24, 2013), p. 39. ISSN: 1471-2350. DOI: 10.1186/1471-2350-14-39. pmid: 23521807. URL: <http://www.ncbi.nlm.nih.gov/pmc/articles/PMC3616917/>.
- [28] Sarah Gallant and Gary Gilkeson. “ETS Transcription Factors and Regulation of Immunity”. In: *Archivum Immunologiae et Therapiae Experimentalis* 54.3 (June 1, 2006), pp. 149–163. ISSN: 0004-069X, 1661-4917. DOI: 10.1007/s00005-006-0017-z. URL: <https://link-springer-com/article/10.1007/s00005-006-0017-z> (visited on 10/12/2017).
- [29] K Yamazaki et al. “A Genome-Wide Association Study Identifies 2 Susceptibility Loci for Crohn’s Disease in a Japanese Population.” In: *Gastroenterology* 144.4 (Apr. 2013), pp. 781–788. ISSN: 0016-5085. DOI: 10.1053/j.gastro.2012.12.021. pmid: 23266558. URL: <http://europepmc.org/abstract/MED/23266558> (visited on 05/03/2017).
- [30] Kyle Kai-How Farh et al. “Genetic and Epigenetic Fine Mapping of Causal Autoimmune Disease Variants”. In: *Nature* 518.7539 (2015), pp. 337–343.
- [31] Joanna M. Peloquin et al. “Characterization of Candidate Genes in Inflammatory Bowel Disease-associated Risk Loci”. In: *JCI Insight* 1.13 (2016). ISSN: 2379-3708. DOI: 10.1172/jci.insight.87899. pmid: 27668286. URL: <http://www.ncbi.nlm.nih.gov/pmc/articles/PMC5033062/> (visited on 05/03/2017).
- [32] Laura A. Warg et al. “The Role of the E2F1 Transcription Factor in the Innate Immune Response to Systemic LPS”. In: *American Journal of Physiology. Lung Cellular and Molecular Physiology* 303.5 (Sept. 2012), pp. L391–400. ISSN: 1522-1504. DOI: 10.1152/ajplung.00369.2011. pmid: 22707615.
- [33] Lei Ying et al. “Chronic Inflammation Promotes Retinoblastoma Protein Hyperphosphorylation and E2F1 Activation”. In: *Cancer Research* 65.20 (Oct. 15, 2005), pp. 9132–9136. ISSN: 0008-5472. DOI: 10.1158/0008-5472.CAN-05-1358. pmid: 16230367.
- [34] Rossana Colla Soletti et al. “Immunohistochemical Analysis of Retinoblastoma and  $\beta$ -Catenin as an Assistant Tool in the Differential Diagnosis between Crohn’s Disease and Ulcerative Colitis”. In: *PLOS ONE* 8.8 (Aug. 14, 2013), e70786. ISSN: 1932-6203. DOI: 10.1371/journal.pone.0070786. URL: <http://journals.plos.org/plosone/article?id=10.1371/journal.pone.0070786> (visited on 10/13/2017).
- [35] Yoram Groner et al. *RUNX Proteins in Development and Cancer*. Google-Books-ID: 1pNcDgAAQBAJ. Springer, Mar. 15, 2017. 518 pp. ISBN: 978-981-10-3233-2.
- [36] Wanling Yang et al. “Genome-Wide Association Study in Asian Populations Identifies Variants in ETS1 and WDFY4 Associated with Systemic Lupus Erythematosus”. In: *PLoS genetics* 6.2 (Feb. 12, 2010), e1000841. ISSN: 1553-7404. DOI: 10.1371/journal.pgen.1000841. pmid: 20169177.
- [37] N. Muthusamy, K. Barton, and J. M. Leiden. “Defective Activation and Survival of T Cells Lacking the Ets-1 Transcription Factor”. In: *Nature* 377.6550 (Oct. 19, 1995), pp. 639–642. ISSN: 0028-0836. DOI: 10.1038/377639a0. pmid: 7566177.
- [38] Stéphanie Eyquem et al. “The Ets-1 Transcription Factor Is Required for Complete Pre-T Cell Receptor Function and Allelic Exclusion at the T Cell Receptor  $\beta$  Locus”. In: *Proceedings of the National Academy of Sciences of the United States of America* 101.44 (Feb. 11, 2004), pp. 15712–15717. ISSN: 0027-8424, 1091-6490. DOI: 10.1073/pnas.0405546101. pmid: 15496469. URL: <http://www.pnas.org/content/101/44/15712> (visited on 10/13/2017).

- [39] J. C. Bories et al. “Increased T-Cell Apoptosis and Terminal B-Cell Differentiation Induced by Inactivation of the Ets-1 Proto-Oncogene”. In: *Nature* 377.6550 (Oct. 19, 1995), pp. 635–638. ISSN: 0028-0836. DOI: 10.1038/377635a0. pmid: 7566176.
- [40] Roland Grenningloh, Bok Yun Kang, and I-Cheng Ho. “Ets-1, a Functional Cofactor of T-Bet, Is Essential for Th1 Inflammatory Responses”. In: *Journal of Experimental Medicine* 201.4 (Feb. 21, 2005), pp. 615–626. ISSN: 0022-1007, 1540-9538. DOI: 10.1084/jem.20041330. pmid: 15728239. URL: <http://jem.rupress.org/content/201/4/615> (visited on 10/12/2017).
- [41] Enguerran Mouly et al. “The Ets-1 Transcription Factor Controls the Development and Function of Natural Regulatory T Cells”. In: *The Journal of Experimental Medicine* 207.10 (Sept. 27, 2010), pp. 2113–2125. ISSN: 1540-9538. DOI: 10.1084/jem.20092153. pmid: 20855499.
- [42] R John Simes. “An Improved Bonferroni Procedure for Multiple Tests of Significance”. In: *Biometrika* 73.3 (1986), pp. 751–754.
- [43] Huwenbo Shi, Gleb Kichaev, and Bogdan Pasaniuc. “Contrasting the Genetic Architecture of 30 Complex Traits from Summary Association Data”. In: *The American Journal of Human Genetics* 99.1 (July 7, 2016), pp. 139–153. ISSN: 0002-9297, 1537-6605. DOI: 10.1016/j.ajhg.2016.05.013. pmid: 27346688. URL: [http://www.cell.com/ajhg/abstract/S0002-9297\(16\)30148-3](http://www.cell.com/ajhg/abstract/S0002-9297(16)30148-3) (visited on 06/17/2017).
